# Supplementary material for: Effect of ligand substituents on the reactivity pathways of copper(ii) complexes towards electrocatalytic water oxidation
Source: Royal Society of Chemistry journal article supplement (doi:10.1039/d4dt01852d), 2024-01-01
Supplement: d4dt01852d1.pdf [file d4dt01852d1.pdf]

**Supporting Information  
For**

**Effect of ligand substituents on the reactivity conduits of copper (II) complexes towards  
electrocatalytic water oxidation**

Hemrupa Kuilya,<sup>a</sup> Pranjal Das,<sup>a</sup> Swati Basak,<sup>a</sup> Debajit Sarma,<sup>b</sup> Pradyumna Mazumdar,<sup>a</sup>  
Diganta Choudhury <sup>\*,a</sup> and Apurba Kalita <sup>\*,a</sup>

<sup>a</sup>*Department of Chemistry, B. Borooah College, Guwahati, Assam 781007, India*

<sup>b</sup>*Department of Chemistry, Indian Institute of Technology Patna, Patna 801103, Bihar, India*

## Table of Contents:

| Sl. No. | Contents                                                                                                                                                                                                                                                                                                                                                                   | Page       |
|---------|----------------------------------------------------------------------------------------------------------------------------------------------------------------------------------------------------------------------------------------------------------------------------------------------------------------------------------------------------------------------------|------------|
| 1       | <b>Experimental Procedures</b>                                                                                                                                                                                                                                                                                                                                             | <b>7-8</b> |
| 2       | <b>Figure S1.</b> UV-visible spectrum of <b>L<sub>1</sub>H</b> in methanol                                                                                                                                                                                                                                                                                                 | <b>9</b>   |
| 3       | <b>Figure S2.</b> FT-IR spectrum of <b>L<sub>1</sub>H</b> in KBr                                                                                                                                                                                                                                                                                                           | <b>9</b>   |
| 4       | <b>Figure S3</b> ESI-Mass spectrum of the <b>L<sub>1</sub>H</b> in methanol                                                                                                                                                                                                                                                                                                | <b>9</b>   |
| 5       | <b>Figure S4</b> <sup>1</sup> H-NMR of <b>L<sub>1</sub>H</b> in CDCl <sub>3</sub>                                                                                                                                                                                                                                                                                          | <b>10</b>  |
| 6       | <b>Figure S5</b> <sup>13</sup> C-NMR of <b>L<sub>1</sub>H</b> in CDCl <sub>3</sub>                                                                                                                                                                                                                                                                                         | <b>10</b>  |
| 7       | <b>Figure S6.</b> UV-visible spectrum of ligand <b>L<sub>3</sub>H</b> in methanol                                                                                                                                                                                                                                                                                          | <b>10</b>  |
| 8       | <b>Figure S7.</b> FT-IR spectrum of <b>L<sub>3</sub>H</b> in KBr.                                                                                                                                                                                                                                                                                                          | <b>11</b>  |
| 9       | <b>Figure S8.</b> <sup>1</sup> H-NMR of <b>L<sub>3</sub>H</b> in CD <sub>3</sub> OD                                                                                                                                                                                                                                                                                        | <b>11</b>  |
| 10      | <b>Figure S9.</b> <sup>13</sup> C-NMR of <b>L<sub>3</sub>H</b> in CD <sub>3</sub> OD                                                                                                                                                                                                                                                                                       | <b>11</b>  |
| 11      | <b>Figure S10.</b> UV-visible spectrum of complex <b>1</b> in methanol. The inset shows a magnified view of the 400-1000 nm region.                                                                                                                                                                                                                                        | <b>12</b>  |
| 12      | <b>Figure S11.</b> UV-visible spectrum of complex <b>1</b> in pH 7 buffer. The inset shows a magnified view of the 400-1000 nm region.                                                                                                                                                                                                                                     | <b>12</b>  |
| 13      | <b>Figure. S12.</b> FT-IR spectrum of complex <b>1</b> in KBr.                                                                                                                                                                                                                                                                                                             | <b>12</b>  |
| 14      | <b>Figure .S13.</b> UV-visible spectrum of complex <b>3</b> in methanol. The inset shows a magnified view of the 400-1000 nm region.                                                                                                                                                                                                                                       | <b>13</b>  |
| 15      | <b>Figure S14.</b> FT-IR spectrum of complex <b>3</b> in KBr.                                                                                                                                                                                                                                                                                                              | <b>13</b>  |
| 16      | <b>Figure S15.</b> PXRD pattern of complex <b>3</b>                                                                                                                                                                                                                                                                                                                        | <b>13</b>  |
| 17      | <b>Figure S16.</b> Plot of <i>i<sub>p</sub></i> vs. <i>v</i> <sup>1/2</sup> for the Cu <sup>II</sup> / Cu <sup>I</sup> couple of complex <b>1</b>                                                                                                                                                                                                                          | <b>14</b>  |
| 18      | <b>Figure S17.</b> Cyclic voltammogram of complex <b>1</b> at different scan rate. (black, red, green, navy blue, light blue, pink, yellow, dark yellow, dark blue, purple line at 10, 20, 30, 40, 50, 60, 70, 80, 90 and 100 mV/sec respectively)                                                                                                                         | <b>14</b>  |
| 19      | <b>Figure S18.</b> Plot of <i>i<sub>p</sub></i> vs. <i>v</i> <sup>1/2</sup> for the Cu <sup>II</sup> / Cu <sup>I</sup> couple of complex <b>3</b>                                                                                                                                                                                                                          | <b>14</b>  |
| 20      | <b>Figure S19.</b> Cyclic voltammogram of complex <b>3</b> at different scan rate (black, red, green, dark blue, light blue, magenta and yellow line at 80, 70, 60, 50, 40, 30 and 20 mV/sec respectively)                                                                                                                                                                 | <b>15</b>  |
| 21      | <b>Figure S20 (a)</b> Differential pulse voltammogram (DPV) of complex <b>1</b> in 0.1 M phosphate buffer at pH 6.07(black), 6.61(red), 7.01(green) and 7.41(dark blue). <b>(b)</b> Pourbaix diagram of complex <b>1</b> depicting change of potential of first (blk line), second (red line) and third (blue line) anodic peak with variation of pH of the buffer medium. | <b>15</b>  |
| 22      | <b>Figure S21.(a)</b> Differential pulse voltammogram (DPV) of complex <b>2</b> in 0.1 M phosphate buffer at pH 7.0 (dark blue), 7.6 (green), 7.8 (red) and 8.0 (black). <b>(b)</b> Pourbaix diagram of complex <b>2</b> depicting change of potential of first (blk line), second (red line) and third (blue line) anodic peak with variation of pH of the buffer medium. | <b>16</b>  |

|    |                                                                                                                                                                                                                                                                                                                                                                                                                                                                                                                                                                                                                                                                                                                                                       |    |
|----|-------------------------------------------------------------------------------------------------------------------------------------------------------------------------------------------------------------------------------------------------------------------------------------------------------------------------------------------------------------------------------------------------------------------------------------------------------------------------------------------------------------------------------------------------------------------------------------------------------------------------------------------------------------------------------------------------------------------------------------------------------|----|
| 23 | <b>Figure.S22</b> (a) Differential pulse voltammogram (DPV) of complex <b>3</b> in 0.1 M phosphate buffer at pH 6.8 (black), 7.4 (red), 7.6 (green) and 7.9 (blue). (b) Pourbaix diagram of complex <b>3</b> depicting change of potential of first (black line), second (red line), third (blue line) and fourth (pink line) anodic peak with variation of pH of the buffer medium.                                                                                                                                                                                                                                                                                                                                                                  | 16 |
| 24 | <b>Figure.S23</b> (a) Plot of $E_{\text{anode}}$ (V vs. Ag/AgCl) vs. $\ln v$ for $\text{Cu}^{\text{II}}/\text{Cu}^{\text{I}}$ couple (b) Plot of $E_{\text{cathode}}$ (V vs. Ag/AgCl) vs. $\ln v$ for $\text{Cu}^{\text{II}}/\text{Cu}^{\text{I}}$ couple (c) Plot of $E_{\text{anode}}$ (V vs. Ag/AgCl) vs. $\ln v$ for $\text{Cu}^{\text{III}}/\text{Cu}^{\text{II}}$ couple (d) Plot of $E_{\text{cathode}}$ (V vs. Ag/AgCl) vs. $\ln v$ for $\text{Cu}^{\text{III}}/\text{Cu}^{\text{II}}$ couple (e) Plot of $E_{a/2}$ (V vs. Ag/AgCl) vs. $\ln v$ for third anodic peak (f) Plot of $E_{a/2}$ (V vs. Ag/AgCl) vs. $\ln v$ for fourth anodic peak (g) Plot of $E_{a/2}$ (V vs. Ag/AgCl) vs. $\ln v$ for fifth anodic peak for complex <b>1</b> . | 17 |
| 25 | <b>Figure S24.</b> (a) Plot of $E_{\text{anode}}$ (V vs. Ag/AgCl) vs. $\ln v$ for $\text{Cu}^{\text{II}}/\text{Cu}^{\text{I}}$ couple (b) Plot of $E_{\text{cathode}}$ (V vs. Ag/AgCl) vs. $\ln v$ for $\text{Cu}^{\text{II}}/\text{Cu}^{\text{I}}$ couple (c) Plot of $E_{a/2}$ (V vs. Ag/AgCl) vs. $\ln v$ for second anodic peak (d) Plot of $E_{a/2}$ (V vs. Ag/AgCl) vs. $\ln v$ for third anodic peak (e) Plot of $E_{a/2}$ (V vs. Ag/AgCl) vs. $\ln v$ for fourth anodic peak of complex <b>2</b> .                                                                                                                                                                                                                                            | 18 |
| 26 | <b>Figure S25.</b> (a) Plot of $E_{\text{anode}}$ (V vs. Ag/AgCl) vs. $\ln v$ for $\text{Cu}^{\text{II}}/\text{Cu}^{\text{I}}$ couple (b) Plot of $E_{\text{cathode}}$ (V vs. Ag/AgCl) vs. $\ln v$ for $\text{Cu}^{\text{II}}/\text{Cu}^{\text{I}}$ couple (c) Plot of $E_{a/2}$ (V vs. Ag/AgCl) vs. $\ln v$ for second anodic peak (d) Plot of $E_{a/2}$ (V vs. Ag/AgCl) vs. $\ln v$ for third anodic peak (e) Plot of $E_{a/2}$ (V vs. Ag/AgCl) vs. $\ln v$ for fourth anodic peak for complex <b>3</b> .                                                                                                                                                                                                                                           | 19 |
| 27 | <b>Figure S26.</b> (a) UV-visible spectra of complex <b>1</b> after electrolysis at +0.76 V in neutral phosphate buffer at room temperature. (b) UV-visible spectra of complex <b>2</b> after electrolysis at +0.64V in neutral phosphate buffer at room temperature. (c) UV-visible spectra of complex <b>3</b> after electrolysis at +0.60 V in neutral phosphate buffer at room temperature.                                                                                                                                                                                                                                                                                                                                                       | 20 |
| 28 | <b>Figure S27.</b> Cyclic voltammogram of complex <b>1</b> (black) and analogous $\text{Zn}^{2+}$ -complex (red) in neutral phosphate buffer at 100 $\text{mV s}^{-1}$ scan rate                                                                                                                                                                                                                                                                                                                                                                                                                                                                                                                                                                      | 20 |
| 29 | <b>Figure S28.</b> Cyclic voltammogram of complex <b>2</b> (black) and analogous $\text{Zn}^{2+}$ -complex (red) in neutral phosphate buffer at 100 $\text{mV s}^{-1}$ scan rate                                                                                                                                                                                                                                                                                                                                                                                                                                                                                                                                                                      | 21 |
| 30 | <b>Figure S29.</b> Cyclic voltammogram of complex <b>3</b> (black) and analogous $\text{Zn}^{2+}$ -complex (red) in neutral phosphate buffer at 100 $\text{mV s}^{-1}$ scan rate.                                                                                                                                                                                                                                                                                                                                                                                                                                                                                                                                                                     | 21 |
| 31 | <b>Figure S30.</b> Scan rate normalized CV of (a) complex <b>1</b> , (b) complex <b>2</b> and (c) complex <b>3</b> in 0.1 M neutral phosphate buffer.                                                                                                                                                                                                                                                                                                                                                                                                                                                                                                                                                                                                 | 22 |
| 32 | <b>Figure S31.</b> (Left) Background corrected CV of complex <b>1</b> at 0.14 (black), 0.22 (red), 0.26 (green), 0.30 (blue), 0.38 (cyan), 0.46 (magenta), 0.60 mM (olive), concentration in 0.1 M neutral phosphate buffer. Scan rate: 100 $\text{mV/s}$ . (Right) Catalytic current at 1.51V as a function of the catalyst concentration from 0.14 to 0.60 mM measured in 0.1 M neutral phosphate buffer.                                                                                                                                                                                                                                                                                                                                           | 22 |
| 33 | <b>Figure S32.</b> Plot of current vs. concentration at +0.76V (a), +0.89V (c), +0.97V (e) and +1.08V (g). Plot of current vs. square of concentration at +0.76V (b), +0.89V (d), +0.97V (f) and +1.08V (h) for complex <b>1</b> .                                                                                                                                                                                                                                                                                                                                                                                                                                                                                                                    | 23 |
| 34 | <b>Figure S33.</b> (Left) Background corrected CV of complex <b>3</b> at 0.04 (Black) 0.06 (red), 0.08 (green), 0.10 (dark blue), 0.14 (light blue), 0.18 (magenta), 0.22 (yellow), 0.26 (dark yellow), 0.30 (orange), 0.34 (pink), 0.38 (wine), 0.42 (olive) mM concentration in 0.1 M neutral phosphate buffer. Scan rate: 100 $\text{mV/s}$ . (Right) Plot of catalytic current at 1.52 V against the concentration of the catalyst for complex <b>3</b>                                                                                                                                                                                                                                                                                           | 24 |

|    |                                                                                                                                                                                                                                                                                                                                          |    |
|----|------------------------------------------------------------------------------------------------------------------------------------------------------------------------------------------------------------------------------------------------------------------------------------------------------------------------------------------|----|
| 35 | <b>Figure S34.</b> Background corrected CV of complex 1 (a), complex (b) and complex 3 (c) recorded at 1mM concentration in 0.1 M neutral phosphate buffer at 100mV/sec scan rate. The current density of 1mA/cm <sup>2</sup> was obtained at 1.51V, 1.49V and 1.52 V for complex 1, 2 and 3 respectively.                               | 24 |
| 36 | <b>Figure S35</b> (a) to (d) FOWA for complex 1. (e) Plot of the different $k_{obs}$ values extracted from the foot-of-the-wave analysis at scan rate 90-200 mVs <sup>-1</sup> . The black line represents the average $k_{obs}$ value (~32 s <sup>-1</sup> ).                                                                           | 25 |
| 37 | <b>Figure S36.</b> Foot-of-the-wave analysis plotting $i_{cat}/i_d$ vs. $1/[1+\exp\{(F/RT)(E^o_{cat}-E)\}]$ at 90 (black), 120 (red), 180 (green) and 200 (dark blue) mVs <sup>-1</sup> scan rates for complex 1.                                                                                                                        | 26 |
| 38 | <b>Figure S37.</b> (a) to (e) FOWA. (f) Plot of the different $k_{obs}$ values extracted from the foot-of-the-wave analysis at scan rate 10-50 mVs <sup>-1</sup> for complex 2. In figure (f) the black line represents the average $k_{obs}$ value (~100 s <sup>-1</sup> ).                                                             | 26 |
| 39 | <b>Figure S38</b> Foot-of-the-wave analysis plotting $i_{cat}/i_d$ vs. $1/[1+\exp\{(F/RT)(E^o_{cat}-E)\}]$ at 10 (black), 15 (red), 20 (green), 30 (dark blue) and 50 (cyan) mVs <sup>-1</sup> scan rates for complex 2                                                                                                                  | 27 |
| 40 | <b>Figure S39.</b> (a) to (e) FOWA for complex 2. (f) Plot of the different $k_{obs}$ values extracted from the foot-of-the-wave analysis at scan rate 40-80 mVs <sup>-1</sup> for complex 3. The black line represents the average $k_{obs}$ value (~248 s <sup>-1</sup> ).                                                             | 27 |
| 41 | <b>Figure S40.</b> Foot-of-the-wave analysis plotting $i_{cat}/i_d$ vs. $1/[1+\exp\{(F/RT)(E^o_{cat}-E)\}]$ at 40 (black), 50 (red), 60 (green), 70 (dark blue) and 80 (cyan) mVs <sup>-1</sup> scan rates for complex 3.                                                                                                                | 28 |
| 42 | <b>Figure S41.</b> (a) Plot of charge vs. time recorded during bulk electrolysis of complex 1 at 0.1mM (black), 0.2mM (red), 0.3mM (green), 0.4mM (dark blue) and 0.5mM (light blue) concentration at 1.51 V vs. NHE in 0.1 M neutral phosphate buffer. (b) Plot of total charge vs. concentration of complex 1 after 1h of electrolysis | 28 |
| 43 | <b>Figure S42</b> (a) Plot of charge vs. time recorded during bulk electrolysis of complex 1 at 0.1mM (black), 0.2mM (red), 0.3mM (green), 0.4mM (dark blue) and 0.5mM (light blue) concentration at 1.49 V vs. NHE in 0.1 M neutral phosphate buffer. (b) Plot of total charge vs. concentration of complex 2 after 1h of electrolysis. | 28 |
| 44 | <b>Figure S43</b> (a) Plot of charge vs. time recorded during bulk electrolysis of complex 2 at 0.1mM (black), 0.2mM (red), 0.3mM (green), 0.4mM (dark blue) and 0.5mM (light blue) concentration at 1.52 V vs. NHE in 0.1 M neutral phosphate buffer. (b) Plot of total charge vs. concentration of complex 3 after 1h of electrolysis. | 29 |
| 45 | <b>Figure S44.</b> Plot of current density vs. time obtained from bulk electrolysis experiment with (blue line) and without (red line) complex 1(a), complex 2 (b) and complex 3 (c) in 0.1 M neutral phosphate buffer using ITO working electrode (area 4 cm <sup>2</sup> ) at 1.51 V, 1.49 V and 1.52 V respectively                   | 29 |
| 46 | <b>Figure S45.</b> Plot of concentration of Oxygen evolved against time during bulk electrolysis experiment at 1.52 V versus NHE with complex 1 in 0.1 M neutral phosphate buffer (red line). The black line indicates the theoretical amount of oxygen as assumed by charge passed with 100% faradaic efficiency.                       | 30 |
| 47 | <b>Figure S46.</b> Plot of concentration of Oxygen evolved against time during bulk electrolysis experiment at 1.49 V versus NHE with (blue line) and without (red line) complex 2 in 0.1 M neutral phosphate buffer. The black line indicates the                                                                                       | 30 |

|    |                                                                                                                                                                                                                                                                                                                                                                                                                                                                                                                                                                                                                                                                                                                        |    |
|----|------------------------------------------------------------------------------------------------------------------------------------------------------------------------------------------------------------------------------------------------------------------------------------------------------------------------------------------------------------------------------------------------------------------------------------------------------------------------------------------------------------------------------------------------------------------------------------------------------------------------------------------------------------------------------------------------------------------------|----|
|    | theoretical amount of oxygen as assumed by charge passed with 100% faradaic efficiency.                                                                                                                                                                                                                                                                                                                                                                                                                                                                                                                                                                                                                                |    |
| 48 | <b>Figure S47.</b> Plot of concentration of Oxygen evolved against time during bulk electrolysis experiment at 1.52 V versus NHE with complex <b>3</b> in 0.1 M neutral phosphate buffer (red line). The black line indicates the theoretical amount of oxygen as assumed by charge passed with 100% faradaic efficiency.                                                                                                                                                                                                                                                                                                                                                                                              | 30 |
| 49 | <b>Figure S48.</b> Cyclic voltammogram of complex <b>1</b> (a), complex <b>(b)</b> and complex <b>(c)</b> before (black) and after electrolysis (red) at 1.51 V, 1.49 V and 1.52 V vs NHE respectively for complex 1, complex 2 and complex 3 in 0.1 M neutral phosphate buffer                                                                                                                                                                                                                                                                                                                                                                                                                                        | 31 |
| 50 | <b>Figure S49. (a)</b> UV-visible spectra of complex <b>1</b> before electrolysis (black), just after completion of electrolysis (red) and after 1h of completion of electrolysis (green) at 1.51 V vs. NHE in 0.1 M neutral phosphate buffer. <b>(b)</b> UV-visible spectra of complex <b>2</b> before electrolysis (blue), just after completion of electrolysis (green) and after 1h of completion of electrolysis (black) at 1.49 V vs. NHE in 0.1 M neutral phosphate buffer. <b>(c)</b> UV-visible spectra of complex <b>3</b> before electrolysis (blue), just after completion of electrolysis (green) and after 1h of completion of electrolysis (black) at 1.52 V vs. NHE in 0.1 M neutral phosphate buffer. | 32 |
| 51 | <b>Figure S50.</b> Cyclic voltammogram recorded in 0.1 M neutral phosphate buffer with fresh (black line) and used (red line) ITO working electrode (area 4 cm <sup>2</sup> ) for complex <b>1</b>                                                                                                                                                                                                                                                                                                                                                                                                                                                                                                                     | 33 |
| 52 | <b>Figure S51.</b> Cyclic voltammogram recorded in 0.1 M neutral phosphate buffer with fresh (black line) and used (red line) ITO working electrode (area 4 cm <sup>2</sup> ) for complex <b>2</b>                                                                                                                                                                                                                                                                                                                                                                                                                                                                                                                     | 33 |
| 53 | <b>Figure S52.</b> Cyclic voltammogram recorded in 0.1 M neutral phosphate buffer with fresh (black line) and used (red line) ITO working electrode (area 4 cm <sup>2</sup> ) for complex <b>3</b> .                                                                                                                                                                                                                                                                                                                                                                                                                                                                                                                   | 33 |
| 54 | <b>Figure S53.</b> FE-SEM and EDX plot of fresh ITO sample before electrolysis experiment of complex <b>1</b> in neutral phosphate buffer.                                                                                                                                                                                                                                                                                                                                                                                                                                                                                                                                                                             | 34 |
| 55 | <b>Figure S54</b> FE-SEM and EDX plot of used ITO sample after electrolysis experiment of complex <b>1</b> in neutral phosphate buffer.                                                                                                                                                                                                                                                                                                                                                                                                                                                                                                                                                                                | 35 |
| 56 | <b>Figure S55</b> FE-SEM and EDX plot of fresh ITO sample before electrolysis experiment of complex <b>2</b> in neutral phosphate buffer.                                                                                                                                                                                                                                                                                                                                                                                                                                                                                                                                                                              | 36 |
| 57 | <b>Figure S56.</b> FE-SEM and EDX plot of used ITO sample after electrolysis experiment of complex <b>2</b> in neutral phosphate buffer.                                                                                                                                                                                                                                                                                                                                                                                                                                                                                                                                                                               | 37 |
| 58 | <b>Figure S57.</b> FE-SEM and EDX plot of fresh ITO sample before electrolysis experiment of complex <b>3</b> in neutral phosphate buffer.                                                                                                                                                                                                                                                                                                                                                                                                                                                                                                                                                                             | 38 |
| 59 | <b>Figure S58.</b> FE-SEM and EDX plot of used ITO sample after electrolysis experiment of complex <b>3</b> in neutral phosphate buffer.                                                                                                                                                                                                                                                                                                                                                                                                                                                                                                                                                                               | 39 |
| 60 | <b>Figure S59.</b> DFT optimised structure of metal peroxo intermediates generated from (a) Complex <b>1</b> , (b) Complex <b>2</b> and (c) Complex <b>3</b> ).                                                                                                                                                                                                                                                                                                                                                                                                                                                                                                                                                        | 40 |
| 61 | <b>Figure S60.</b> UV-visible spectrum obtained from TDDFT calculations carried out on the DFT optimized structures of metal peroxo intermediates generated from complex <b>1</b> during its catalytic cycle. Peak at 358 nm is assigned for the electronic transition from HOMO-20 to LUMO.                                                                                                                                                                                                                                                                                                                                                                                                                           | 40 |
| 62 | <b>Figure S61.</b> UV-visible spectrum obtained from TDDFT calculations carried out on the DFT optimized structures of metal peroxo intermediates generated from complex <b>2</b> during its catalytic cycle. Peak at 385 nm is assigned for the                                                                                                                                                                                                                                                                                                                                                                                                                                                                       | 41 |

|    |                                                                                                                                                                                                                                                                                                                                                                                                                                                                     |    |
|----|---------------------------------------------------------------------------------------------------------------------------------------------------------------------------------------------------------------------------------------------------------------------------------------------------------------------------------------------------------------------------------------------------------------------------------------------------------------------|----|
|    | electronic transition from HOMO-1 to LUMO.                                                                                                                                                                                                                                                                                                                                                                                                                          |    |
| 63 | <b>Figure S62.</b> UV-visible spectrum obtained from TDDFT calculations carried out on the DFT optimized structures of metal peroxo intermediates generated from complex <b>3</b> during its catalytic cycle. Peak at 387 nm is assigned for the electronic transition from HOMO-1 to LUMO.                                                                                                                                                                         | 41 |
| 64 | <b>Figure S63. (a)</b> Boundary surface diagram of HOMO-20 orbital calculated from the DFT optimized structure of the metal peroxo intermediated generated from complex <b>1</b> showing interaction between $\pi^*$ orbital of the peroxide ion with a d orbital of the metal center. <b>(b)</b> Boundary surface diagram of LUMO calculated from the DFT optimized structure of the metal peroxo intermediated generated from complex <b>1</b> .                  | 42 |
| 65 | <b>Figure S64. (a)</b> Boundary surface diagram of HOMO-1 orbital calculated from the DFT optimized structure of the metal peroxo intermediated generated from complex <b>2</b> showing interaction between $\pi^*$ orbital of the peroxide ion with a d orbital of the metal center. <b>(b)</b> Boundary surface diagram of LUMO calculated from the DFT optimized structure of the metal peroxo intermediated generated from complex <b>2</b> .                   | 42 |
| 66 | <b>Figure S65. (a)</b> Boundary surface diagram of HOMO-1 orbital calculated from the DFT optimized structure of the metal peroxo intermediated generated from complex <b>3</b> showing interaction between $\pi^*$ orbital of the peroxide ion with a d orbital of the metal center. <b>(b)</b> Boundary surface diagram of LUMO calculated from the DFT optimized structure of the metal peroxo intermediated generated from complex <b>3</b> .                   | 43 |
| 67 | <b>Figure S66 (a)</b> UV-visible spectra of complex <b>1</b> before (black line) and after (red line) reaction with Ceric ammonium nitrate in aqueous medium. <b>(b)</b> UV-visible spectra of complex <b>2</b> before (black line) and after (red line) reaction with Ceric ammonium nitrate in aqueous medium. <b>(c)</b> UV-visible spectra of complex <b>3</b> before (black line) and after (red line) reaction with Ceric ammonium nitrate in aqueous medium. | 43 |
| 68 | <b>Figure S67.</b> Plot of concentration of Oxygen evolved against time after addition of 10 ml degassed 1 mM aqueous solution of the metal complexes to 40 mL degassed 100 mM aqueous solution of Cerium ammonium nitrate (CAN) in a gas-tight cell equipped with magnetic stirring bar and calibrated Ocean Optics FOXY probe. The arrow corresponds to the point of addition of the complex solution.                                                            | 44 |
| 69 | <b>Table S1.</b> Total charge passed through working electrode after 1h of electrolysis of complex <b>1</b> , <b>2</b> and <b>3</b> at the $E_{cat}$ potential.                                                                                                                                                                                                                                                                                                     | 44 |
| 70 | <b>Table S2.</b> Crystal data and structure refinement parameters for Complex <b>1</b> , <b>2</b> and <b>3</b>                                                                                                                                                                                                                                                                                                                                                      | 44 |
| 71 | <b>Table S3.</b> Coordinate file of the DFT optimized structure of metal oxo intermediate generated in the catalytic cycle of complex <b>3</b> .                                                                                                                                                                                                                                                                                                                    | 45 |
| 72 | <b>Table S4.</b> Coordinate file of the DFT optimized structure of metal peroxo intermediate generated in the catalytic cycle of complex <b>1</b> .                                                                                                                                                                                                                                                                                                                 | 46 |
| 73 | <b>Table S5.</b> Coordinate file of the DFT optimized structure of metal peroxo intermediate generated in the catalytic cycle of complex <b>2</b> .                                                                                                                                                                                                                                                                                                                 | 48 |
| 74 | <b>Table S6.</b> Coordinate file of the DFT optimized structure of metal peroxo intermediate generated in the catalytic cycle of complex <b>3</b> .                                                                                                                                                                                                                                                                                                                 | 49 |
| 75 | <b>Table S7.</b> TON calculated for complexes <b>1</b> , <b>2</b> and <b>3</b> for chemically driven water oxidation catalytic activity using Cerium ammonium nitrate (CAN).                                                                                                                                                                                                                                                                                        | 50 |

## Experimental Procedures:

All reagents and solvents were purchased from commercial sources and were of reagent grade. UV-visible spectra were recorded on Cary-60 UV-visible spectrophotometer. FT-IR spectra were recorded on a Cary 630 spectrophotometer with sample prepared as KBr pellets.  $^1\text{H-NMR}$  spectra was obtained with a 400MHz Varian FT-spectrometer. Chemical shifts ( $\delta$ ppm) were referenced either with an internal standard ( $\text{Me}_4\text{Si}$ ) for organic compounds or to the residual solvent peaks. The magnetic moment of the complex were measured on a Cambridge magnetic balance. Conductivity measurements were recorded using a Eutech instrument CON 700. Electrochemical measurements were made using CHI 7035E bipotentiostat. Glassy carbon working electrode, Pt wire auxiliary electrode, and Ag/AgCl reference electrode were used in a three-electrode configuration. FE-SEM was recorded on a Zeiss microscope; SUPRA 55VP-Field Emission Scanning Electron Microscope. EDX was recorded on a Zeiss X-ray analyser; SUPRA 55VP-Field. The coating was done with Platinum before the experimental analysis. Powder XRD data were collected by using RigakuSmartlab X-ray diffractometer with Cu-K $\alpha$  radiation ( $\lambda = 1.54056 \text{ \AA}$ ), operating voltage of 40 kV and an operating current of 125 mA.

A suitable single crystal of each compound was carefully selected under a polarizing microscope and glued to a crystal mounting loop with paratone oil. The single crystal data were collected on a BRUKER AXS (D8 Quest System) X-ray diffractometer equipped with PHOTON 100 CMOS detector at 293(2) K. The X-ray generator was operated at 50 kV and 30 mA using Mo K $\alpha$  ( $\lambda = 0.71073 \text{ \AA}$ ) radiation. The unit cell measurement, data collection ( $\varphi$  and  $\omega$  scan), integration, scaling and absorption corrections for the crystals of both complexes was done using Bruker Apex II software.<sup>1</sup>Data were collected with  $\omega$  scan width of  $0.5^\circ$ . Sufficient numbers of frames were collected for different setting of  $\varphi$  keeping the sample-to-detector distance fixed. The data were reduced using SAINTPLUS,<sup>2</sup> and an empirical absorption correction was applied using the SADABS program.<sup>3</sup> The structure was solved and refined using SHELXL97<sup>4</sup> present in the WinGx suit of programs (Version 1.63.04a).<sup>5</sup> All the hydrogen positions were initially located in the difference Fourier maps, and for the final refinement, the hydrogen atoms were placed in geometrically ideal positions and refined in the riding mode. Final refinement included atomic positions for all the atoms, anisotropic thermal parameters for all the non-hydrogen atoms, and isotropic thermal parameters for all the hydrogen atoms. Full-matrix least-squares refinement against  $|F^2|$  was carried out using the WinGx package of programs.<sup>5</sup>The hydrogen atoms of the coordinated and the lattice water were fixed using Olex2 1.2 package of programs.<sup>6,7</sup> Structural illustrations have been drawn with ORTEP-3 for Windows. Details of the structure solution and final refinements for the compounds are given in Table S2.CCDC: 2362016, 1879870 and 2285154 contains the crystallographic data for this paper. These data can be obtained free of charge from The Cambridge Crystallographic Data Center (CCDC) via [www.ccdc.cam.ac.uk/data\\_request/cif](http://www.ccdc.cam.ac.uk/data_request/cif). Structural illustrations have been drawn with ORTEP-3 for Windows.

### Electron count in redox peak using Laviron equations:

To obtain the number of electrons transferred in a redox peak, Laviron equations are used. The Laviron equations are given as below.

$$E_{p,c} = E^{\ominus} - (RT/\alpha nF) \ln(\alpha n\nu/RTk) = C - (RT/\alpha nF) \ln(\nu) \quad (1)$$

$$E_{p,a} = E^{\ominus} + [RT/(1-\alpha)nF] \ln[(1-\alpha)n\nu/RTk] = C + [RT/(1-\alpha)nF] \ln(\nu) \quad (2)$$

$$E_{p/2} = C + [RT/(1-\alpha)nF] \ln(\nu) \quad (3)$$

Where,  $E^{\ominus}$  is the standard potential,  $E_{p,c}$  is the potential for cathodic peak,  $E_{p,a}$  is the potential for anodic peak, R is the ideal gas constant, T is temperature, F is Faraday constant,  $k$  is the rate constant of the electrochemical reaction ( $s^{-1}$ ) and C is the constant.

The  $\alpha$  value is calculated using equation (1) and equation (2) for a reversible couple from the slope of  $E_{p,a}$  vs.  $\ln \nu$  and  $E_{p,c}$  vs.  $\ln \nu$ . With the calculated value of  $\alpha$ , number of electron ( $n$ ) can be calculated. For the irreversible peak, number of electron ( $n$ ) can be calculated using equation (3) from the slope of  $E_{1/2}$  vs.  $\ln \nu$ . The value of  $E_{p,a}$ ,  $E_{p,c}$  and  $E_{1/2}$  are obtained from the cyclic voltammograms of the complexes at different scan rates.

### Calculation of Faradic efficiency

$$\% \text{ Faradic efficiency} = [(\text{Actual amount of oxygen produced}) / (\text{Theoretically calculated amount of oxygen})] \times 100$$

The theoretically calculated amount of oxygen during Bulk Electrolysis (BE) experiment can be obtained using the following relation:

$$\text{Theoretical yield of oxygen (in ppm)} = (QM / 4FV)$$

Where,

Q = Total charge passed during Bulk Electrolysis (BE) experiment in coulomb.

M = Molecular mass of oxygen in milligram

F = Faraday constant

V = Volume of the complex solution used for bulk electrolysis (BE) experiment in Litter



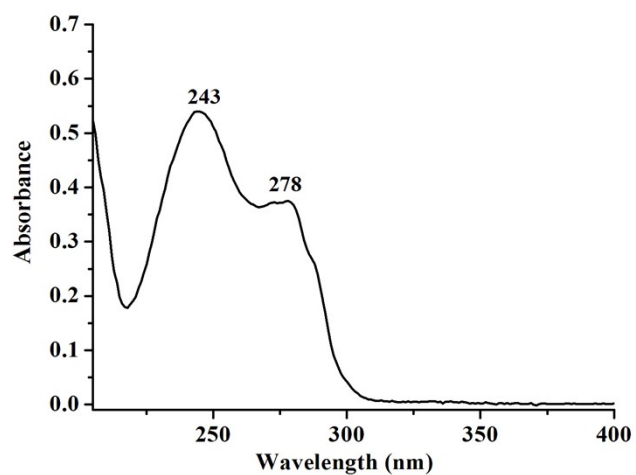

Figure S1. UV-visible spectrum of  $L_1H$  in methanol

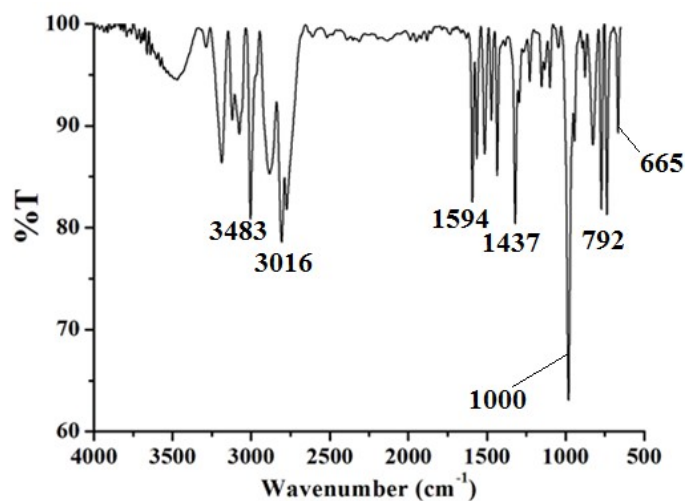

Figure S2 FT-IR spectrum of  $L_1H$  in KBr.

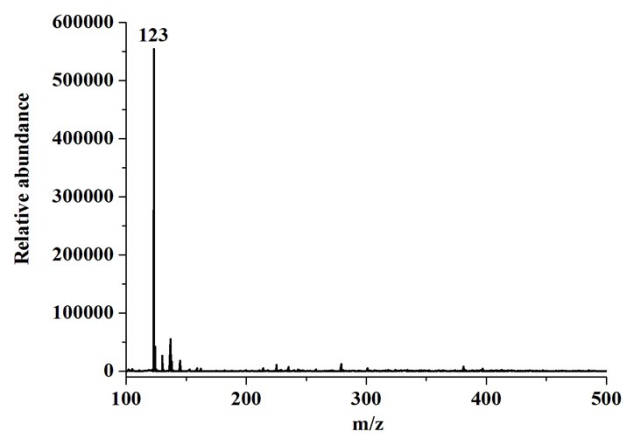

Figure S3 ESI-Mass spectrum of the  $L_1H$  in methanol

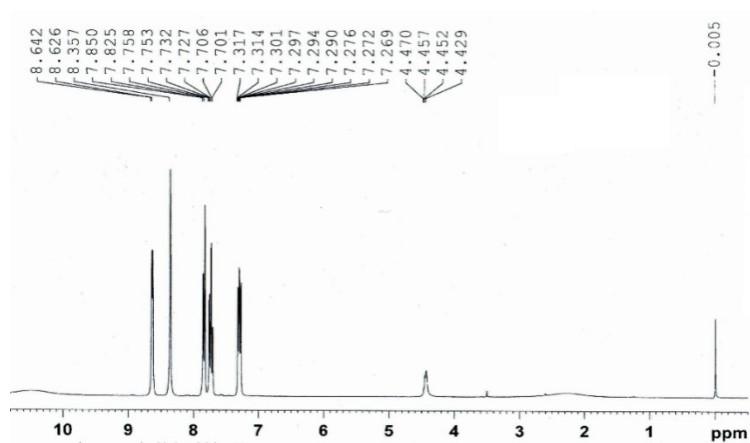

Figure S4  $^1\text{H-NMR}$  of  $\text{L}_1\text{H}$  in  $\text{CDCl}_3$

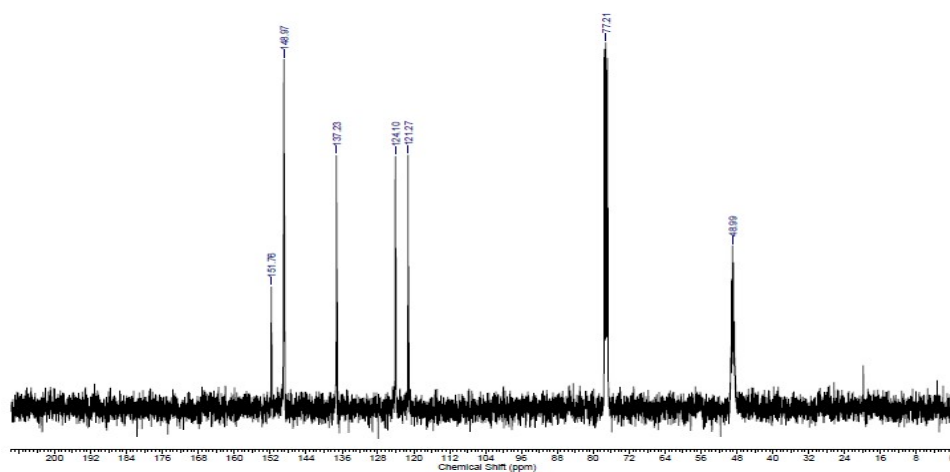

Figure S5  $^{13}\text{C-NMR}$  of  $\text{L}_1\text{H}$  in  $\text{CDCl}_3$

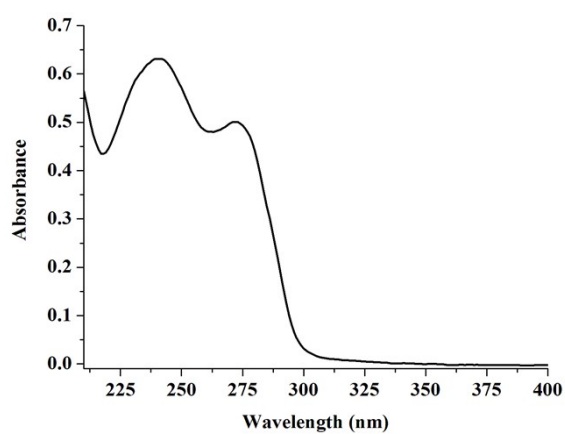

Figure S6. UV-visible spectrum of ligand  $\text{L}_3\text{H}$  in methanol

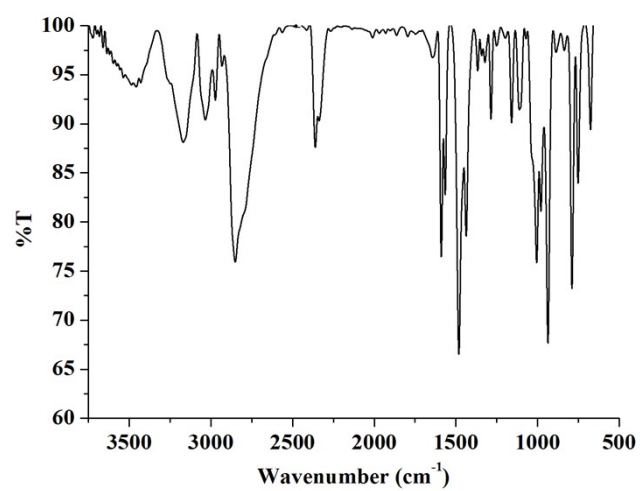

Figure S7. FT-IR spectrum of  $L_3H$  in KBr.

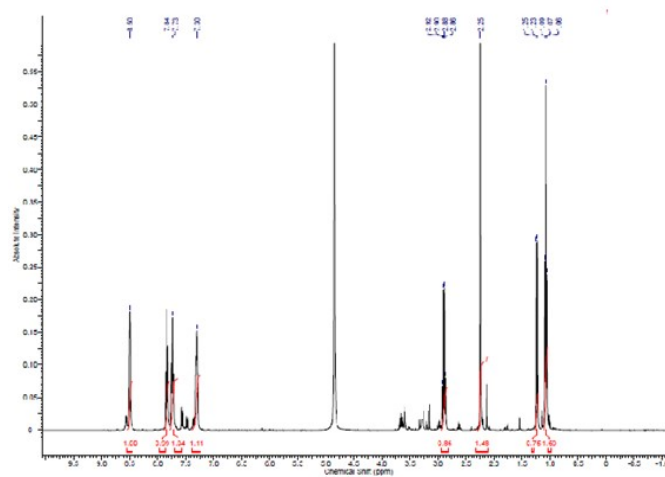

Figure S8.  $^1H$ -NMR of  $L_3H$  in  $CD_3OD$

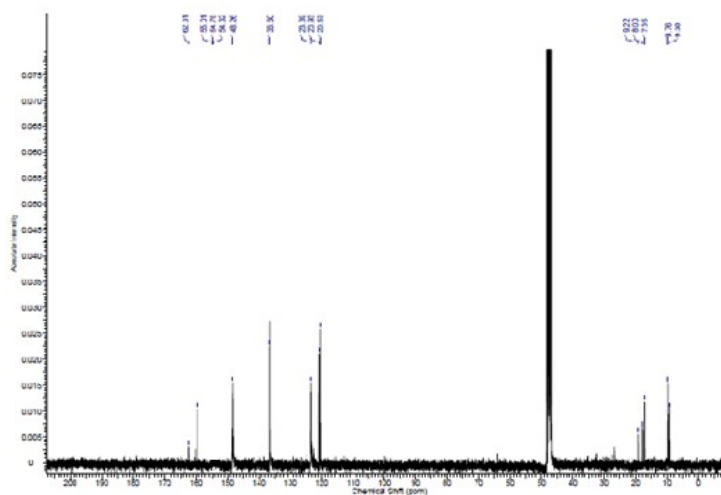

Figure S9.  $^{13}C$ -NMR of  $L_3H$  in  $CD_3OD$

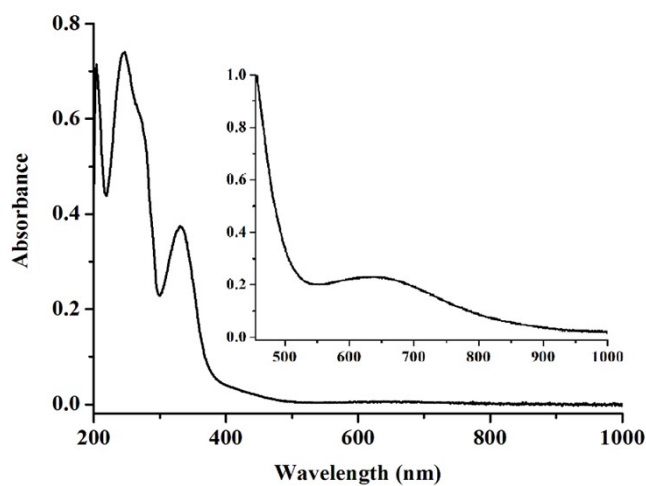

**Figure S10.** UV-visible spectrum of complex 1 in methanol. The inset shows a magnified view of the 400-1000 nm region.

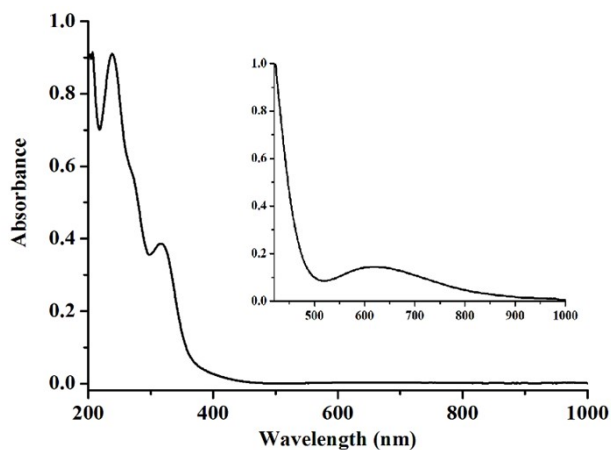

**Figure S11.** UV-visible spectrum of complex 1 in pH 7 buffer. The inset shows a magnified view of the 400-1000 nm region.

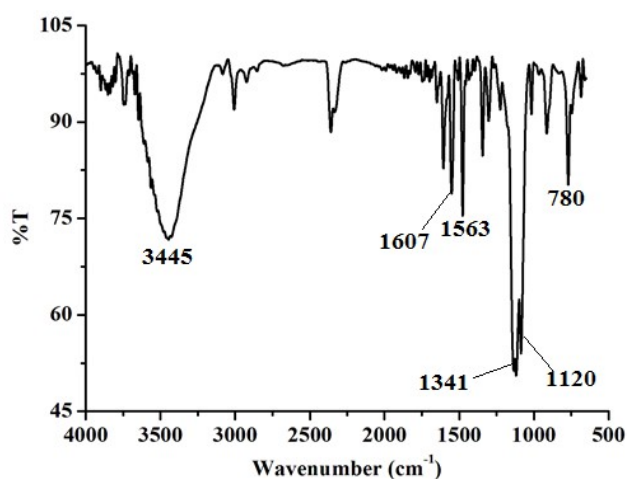

**Figure.S12.** FT-IR spectrum of complex 1 in KBr.

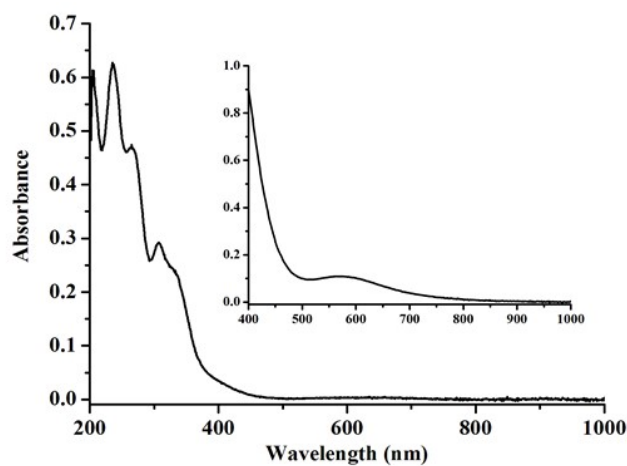

**Figure S13.** UV-visible spectrum of complex 3 in methanol. The inset shows a magnified view of the 400-1000 nm region.

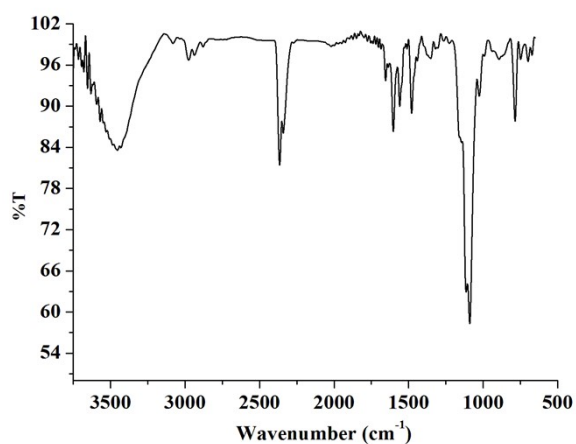

**Figure S14.** FT-IR spectrum of complex 3 in KBr.

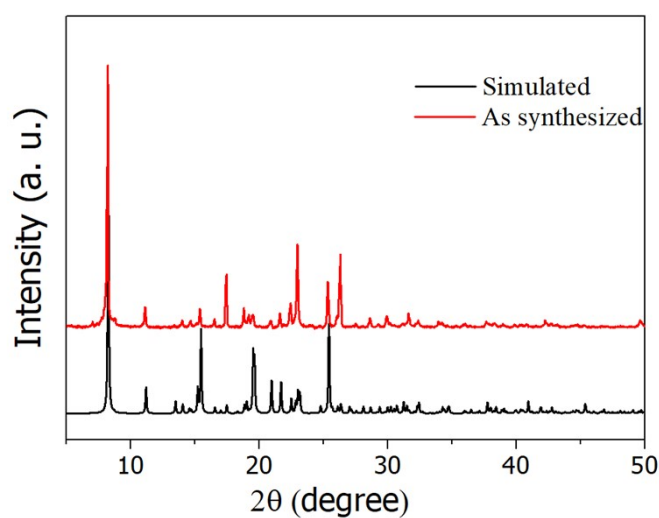

**Figure S15.** PXRD pattern of complex 3

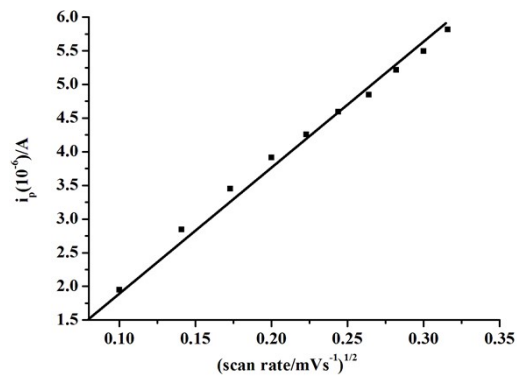

**Figure S16.** Plot of  $i_p$  vs.  $v^{1/2}$  for the  $\text{Cu}^{\text{II}}/\text{Cu}^{\text{I}}$  couple of complex 1

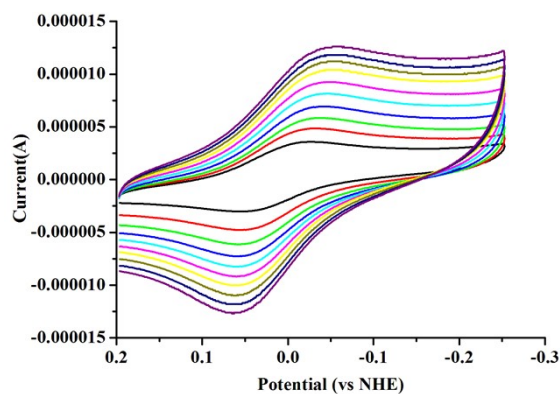

**Figure S17.** Cyclic voltammogram of complex 1 at different scan rate. (black, red, green, navy blue, light blue, pink, yellow, dark yellow, dark blue, purple line at 10, 20, 30, 40, 50, 60, 70, 80, 90 and 100 mV/sec respectively)

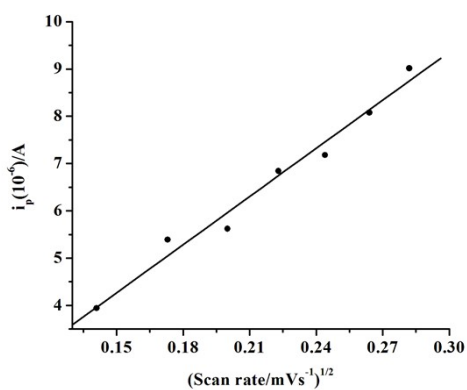

**Figure S18.** Plot of  $i_p$  vs.  $v^{1/2}$  for the  $\text{Cu}^{\text{II}}/\text{Cu}^{\text{I}}$  couple of complex 3

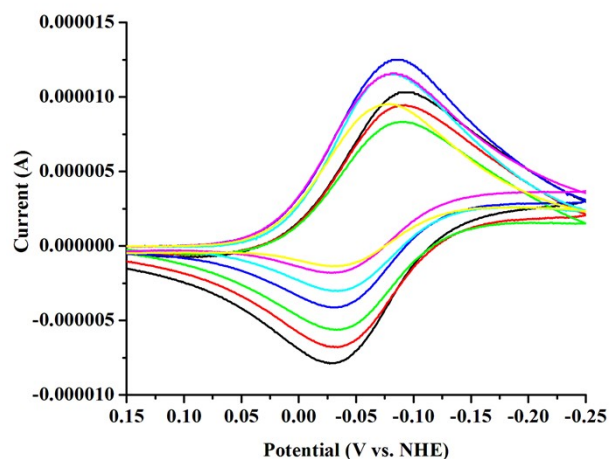

**Figure S19.** Cyclic voltammogram of complex **3** at different scan rate (black, red, green, dark blue, light blue, magenta and yellow line at 80, 70, 60, 50, 40, 30 and 20 mV/sec respectively)

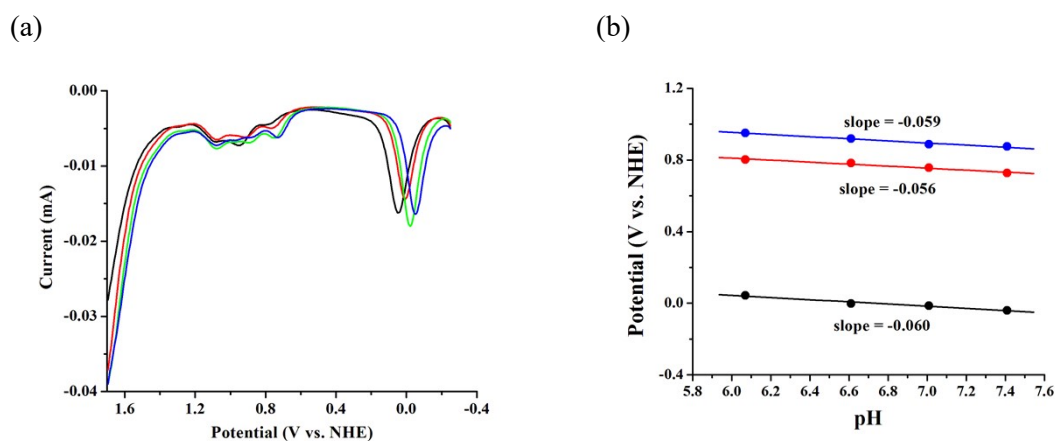

**Figure S20 (a)** Differential pulse voltammogram (DPV) of complex **1** in 0.1 M phosphate buffer at pH 6.07(black), 6.61(red), 7.01(green) and 7.41(dark blue). **(b)** Pourbaix diagram of complex **1** depicting change of potential of first (black line), second (red line) and third (blue line) anodic peak with variation of pH of the buffer medium.

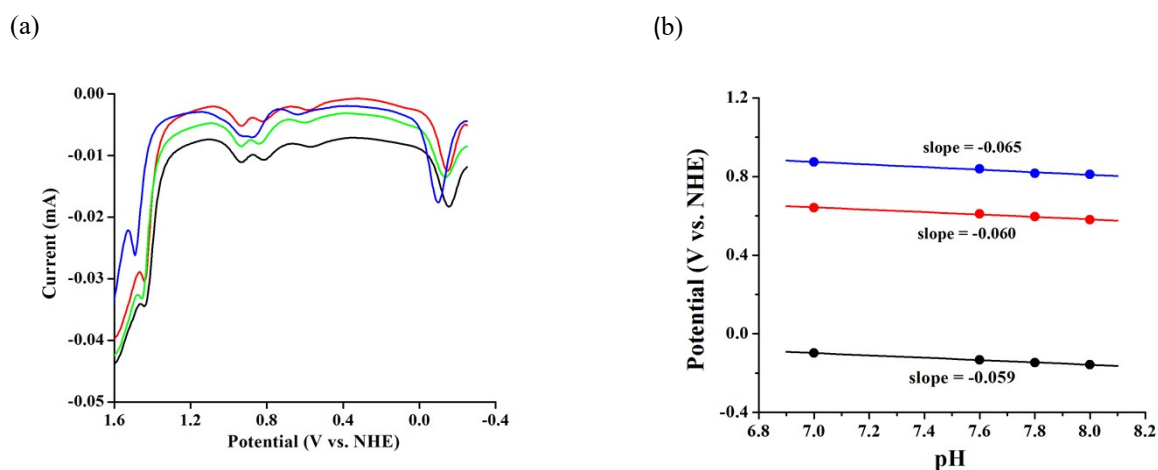

**Figure S21.**(a) Differential pulse voltammogram (DPV) of complex **2** in 0.1 M phosphate buffer at pH 7.0 (dark blue), 7.6 (green), 7.8 (red) and 8.0 (black). (b) Pourbaix diagram of complex **2** depicting change of potential of first (black line), second (red line) and third (blue line) anodic peak with variation of pH of the buffer medium.

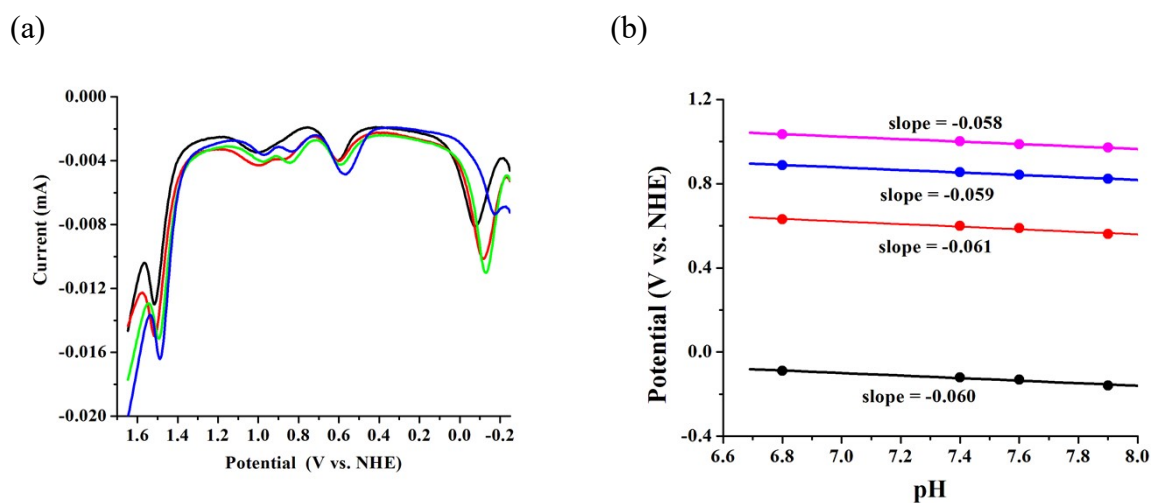

**Figure.S22** (a) Differential pulse voltammogram (DPV) of complex **3** in 0.1 M phosphate buffer at pH 6.8 (black), 7.4 (red), 7.6 (green) and 7.9 (blue). (b) Pourbaix diagram of complex **3** depicting change of potential of first (black line), second (red line), third (blue line) and fourth (pink line) anodic peak with variation of pH of the buffer medium.



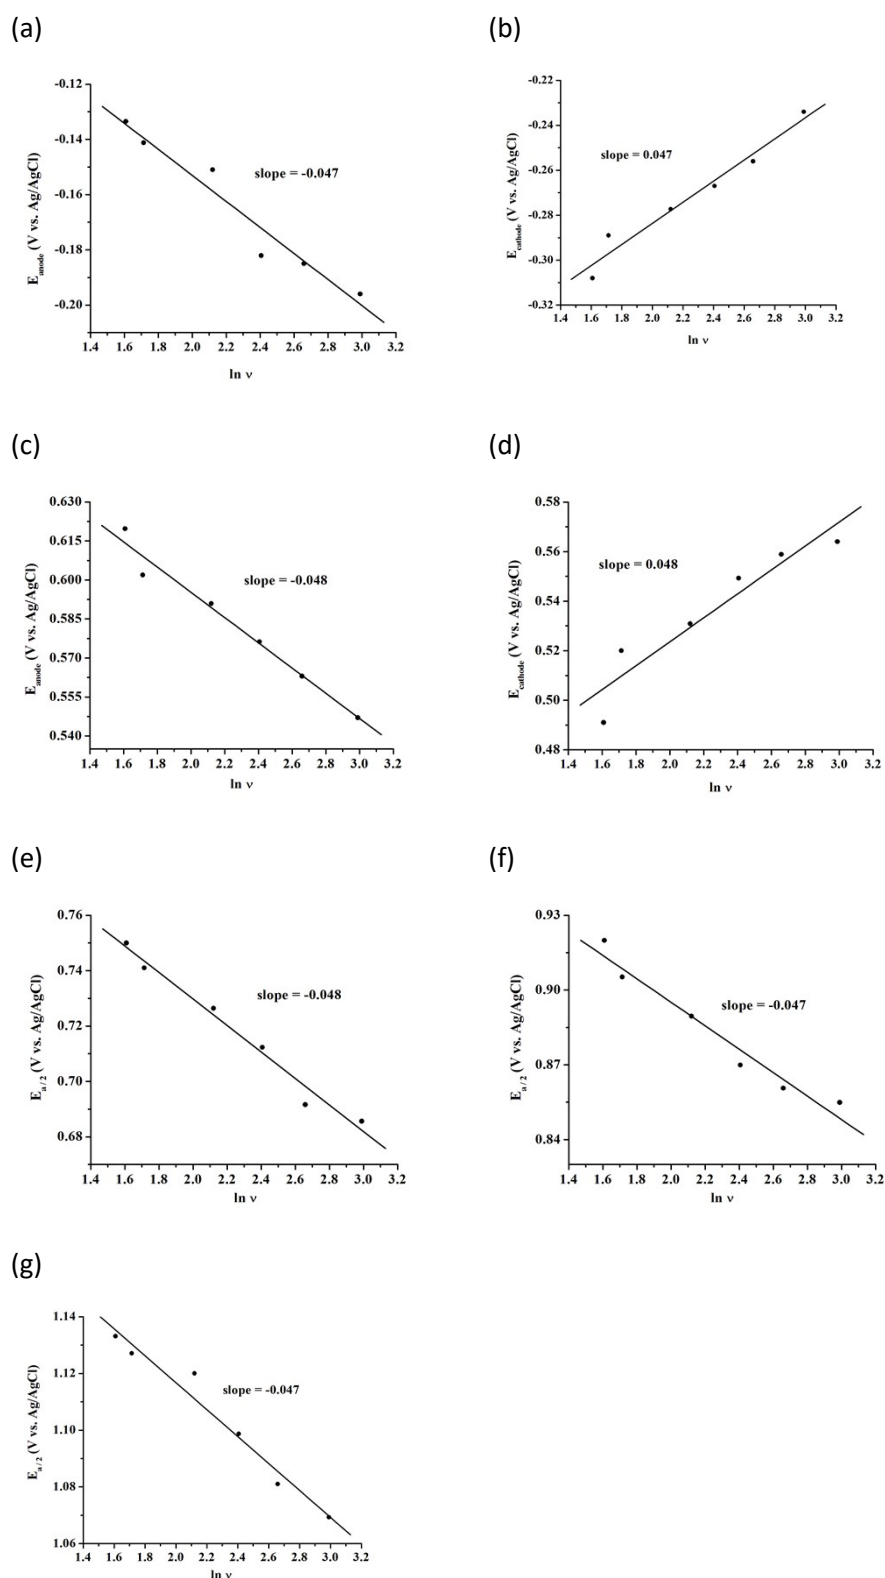

**Figure.S23** (a) Plot of  $E_{\text{anode}}$  (V vs. Ag/AgCl) vs.  $\ln v$  for  $\text{Cu}^{\text{II}}/\text{Cu}^{\text{I}}$  couple (b) Plot of  $E_{\text{cathode}}$  (V vs. Ag/AgCl) vs.  $\ln v$  for  $\text{Cu}^{\text{II}}/\text{Cu}^{\text{I}}$  couple (c) Plot of  $E_{\text{anode}}$  (V vs. Ag/AgCl) vs.  $\ln v$  for  $\text{Cu}^{\text{III}}/\text{Cu}^{\text{II}}$  couple (d) Plot of  $E_{\text{cathode}}$  (V vs. Ag/AgCl) vs.  $\ln v$  for  $\text{Cu}^{\text{III}}/\text{Cu}^{\text{II}}$  couple (e) Plot of  $E_{\text{a}/2}$  (V vs. Ag/AgCl) vs.  $\ln v$  for third anodic peak (f) Plot of  $E_{\text{a}/2}$  (V vs. Ag/AgCl) vs.  $\ln v$  for fourth anodic peak (g) Plot of  $E_{\text{a}/2}$  (V vs. Ag/AgCl) vs.  $\ln v$  for fifth anodic peak for complex 1.

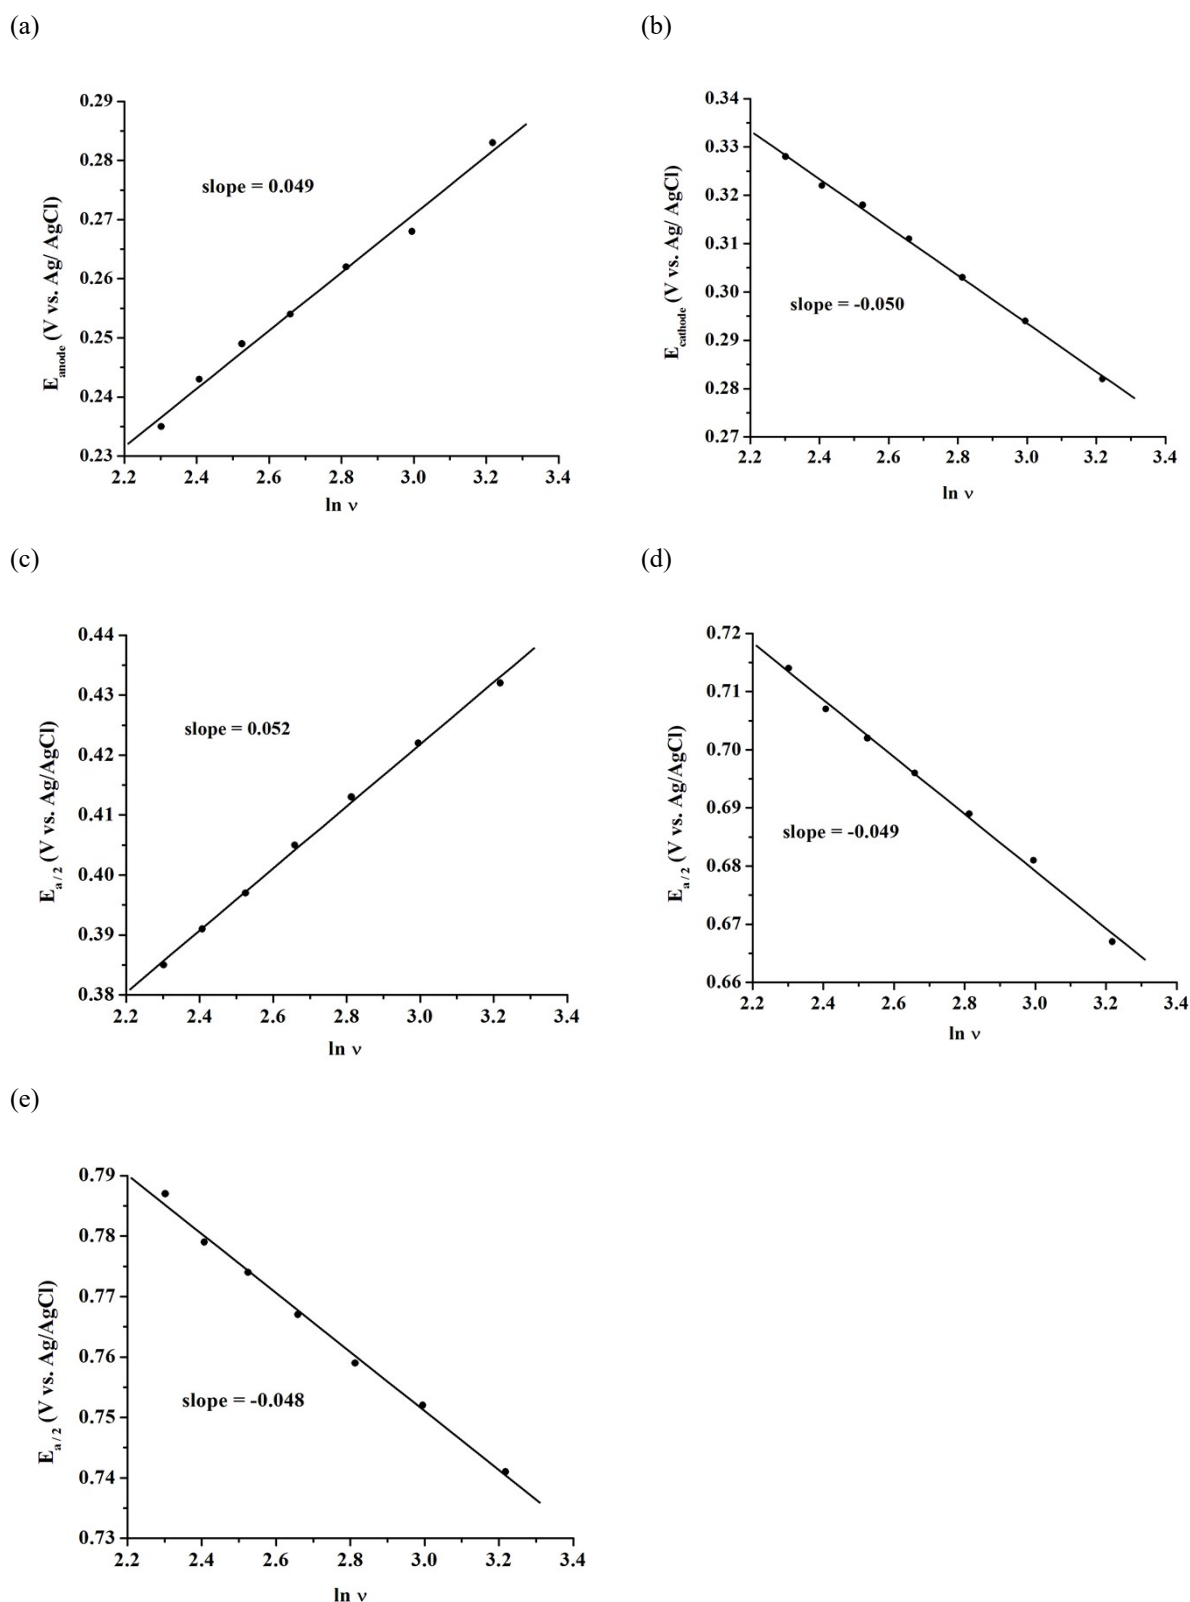

**Figure S24.** (a) Plot of  $E_{\text{anode}}$  (V vs. Ag/AgCl) vs.  $\ln v$  for Cu<sup>II</sup>/Cu<sup>I</sup> couple (b) Plot of  $E_{\text{cathode}}$  (V vs. Ag/AgCl) vs.  $\ln v$  for Cu<sup>II</sup>/Cu<sup>I</sup> couple (c) Plot of  $E_{a/2}$  (V vs. Ag/AgCl) vs.  $\ln v$  for second anodic peak (d) Plot of  $E_{a/2}$  (V vs. Ag/AgCl) vs.  $\ln v$  for third anodic peak (e) Plot of  $E_{a/2}$  (V vs. Ag/AgCl) vs.  $\ln v$  for fourth anodic peak of complex 2.

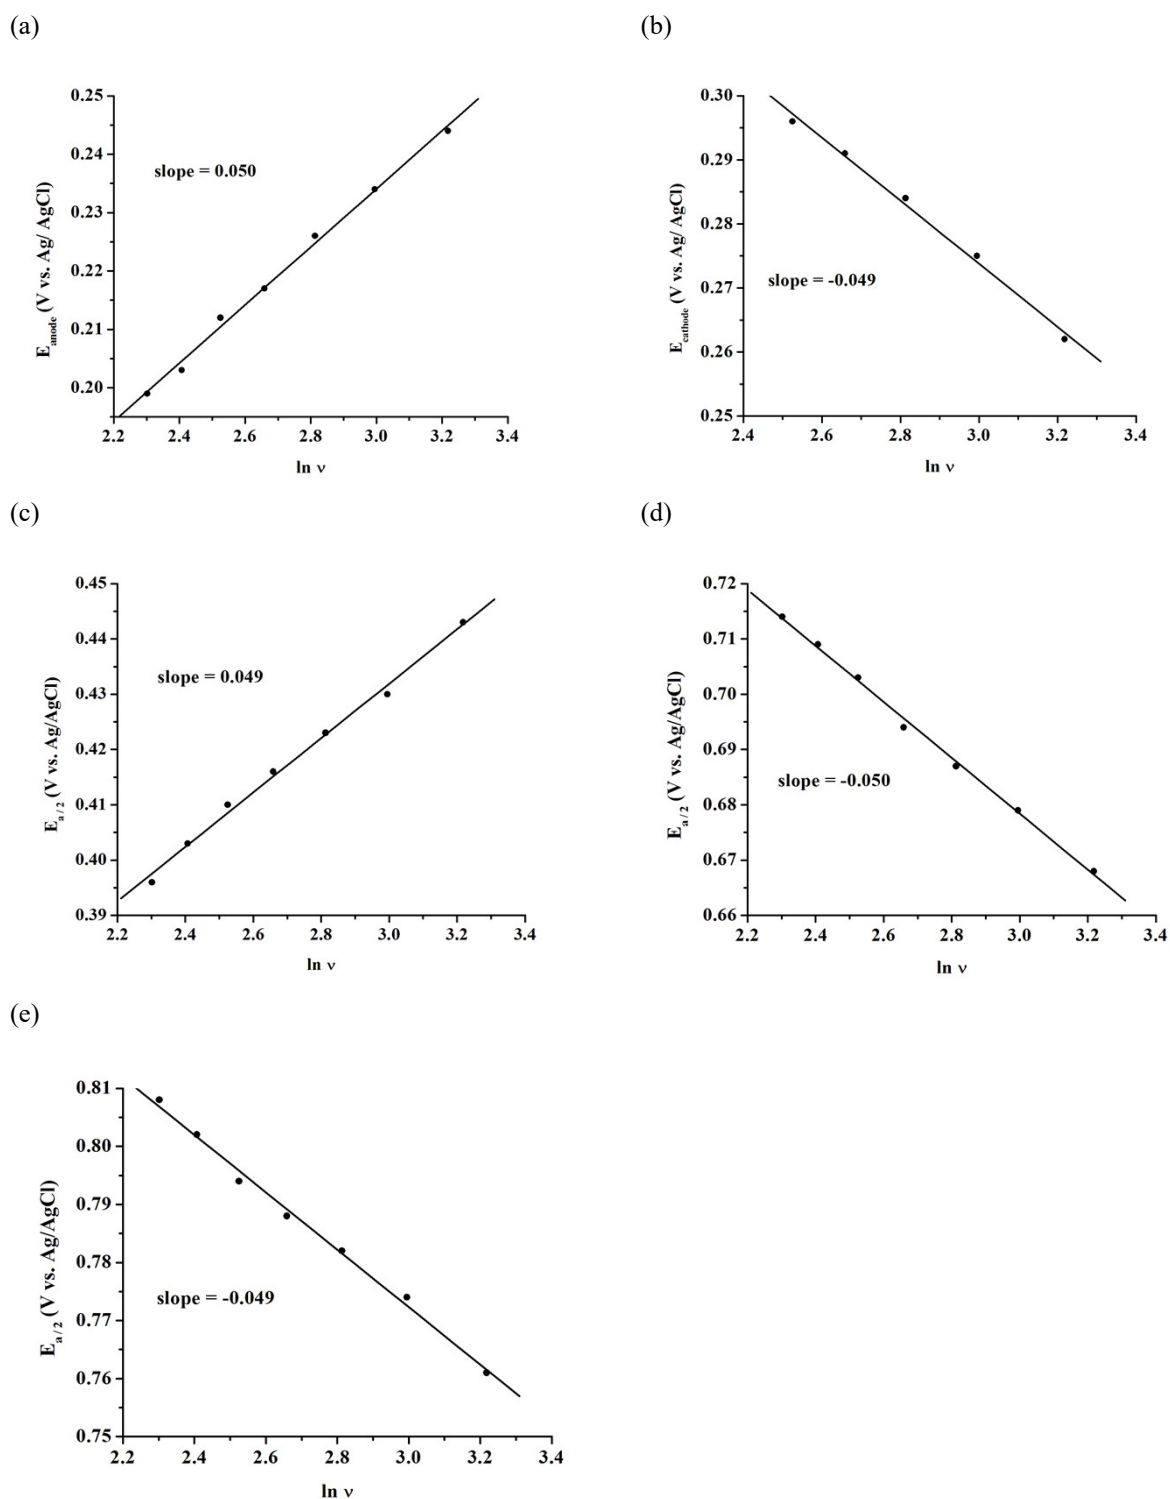

**Figure S25.** (a) Plot of  $E_{\text{anode}}$  (V vs. Ag/AgCl) vs.  $\ln v$  for  $\text{Cu}^{\text{II}}/\text{Cu}^{\text{I}}$  couple (b) Plot of  $E_{\text{cathode}}$  (V vs. Ag/AgCl) vs.  $\ln v$  for  $\text{Cu}^{\text{II}}/\text{Cu}^{\text{I}}$  couple (c) Plot of  $E_{\text{a}/2}$  (V vs. Ag/AgCl) vs.  $\ln v$  for second anodic peak (d) Plot of  $E_{\text{a}/2}$  (V vs. Ag/AgCl) vs.  $\ln v$  for third anodic peak (e) Plot of  $E_{\text{a}/2}$  (V vs. Ag/AgCl) vs.  $\ln v$  for fourth anodic peak for complex **3**.

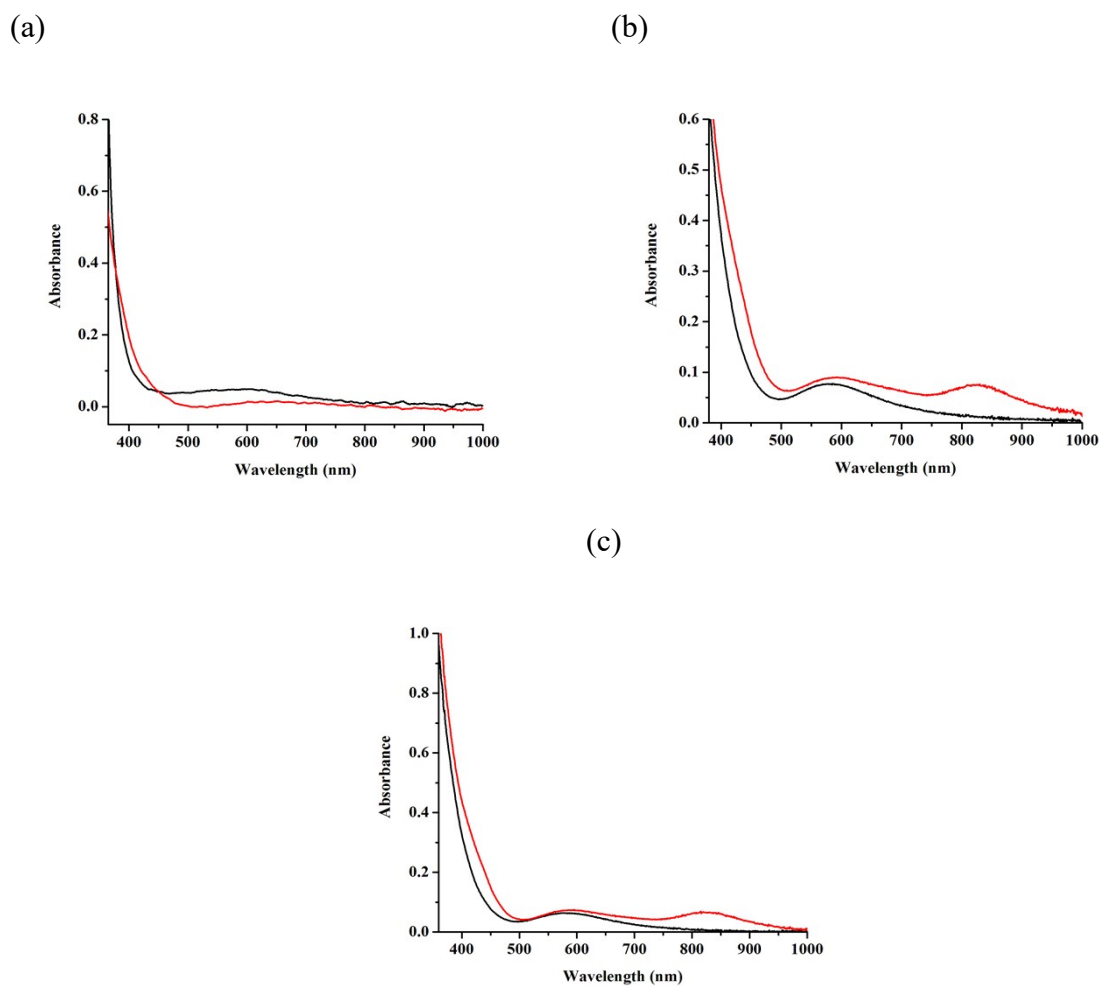

**Figure S26.** (a) UV-visible spectra of complex **1** after electrolysis at +0.76 V in neutral phosphate buffer at room temperature. (b) UV-visible spectra of complex **2** after electrolysis at +0.64V in neutral phosphate buffer at room temperature. (c) UV-visible spectra of complex **3** after electrolysis at +0.60 V in neutral phosphate buffer at room temperature.

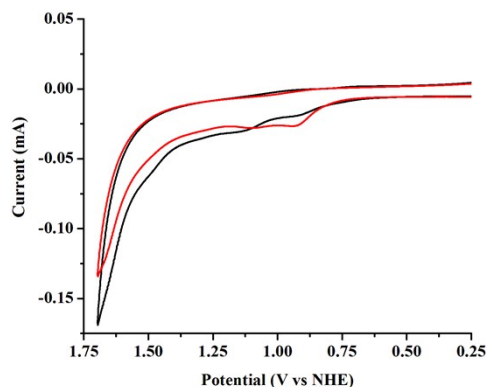

**Figure S27.** Cyclic voltammogram of complex **1** (black) and analogous Zn<sup>2+</sup>-complex (red) in neutral phosphate buffer at 100 mV s<sup>-1</sup> scan rate

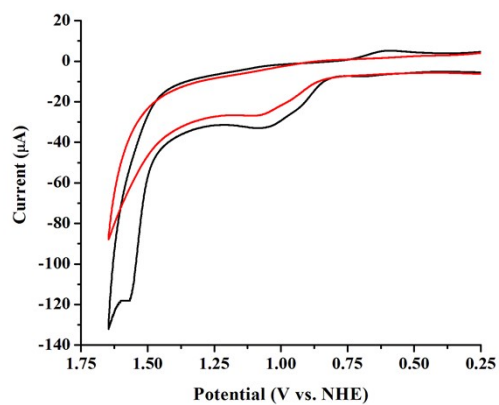

**Figure S28.** Cyclic voltammogram of complex **2** (black) and analogous Zn<sup>2+</sup>-complex (red) in neutral phosphate buffer at 100 mV s<sup>-1</sup> scan rate

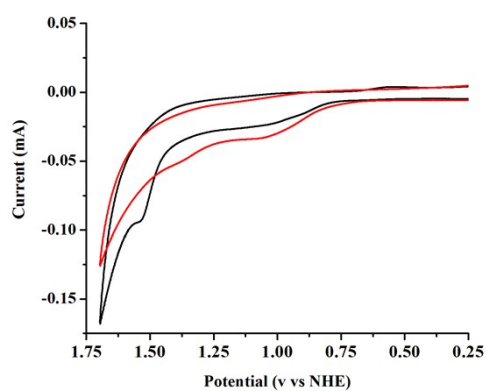

**Figure S29.** Cyclic voltammogram of complex **3** (black) and analogous Zn<sup>2+</sup>-complex (red) in neutral phosphate buffer at 100 mV s<sup>-1</sup> scan rate.

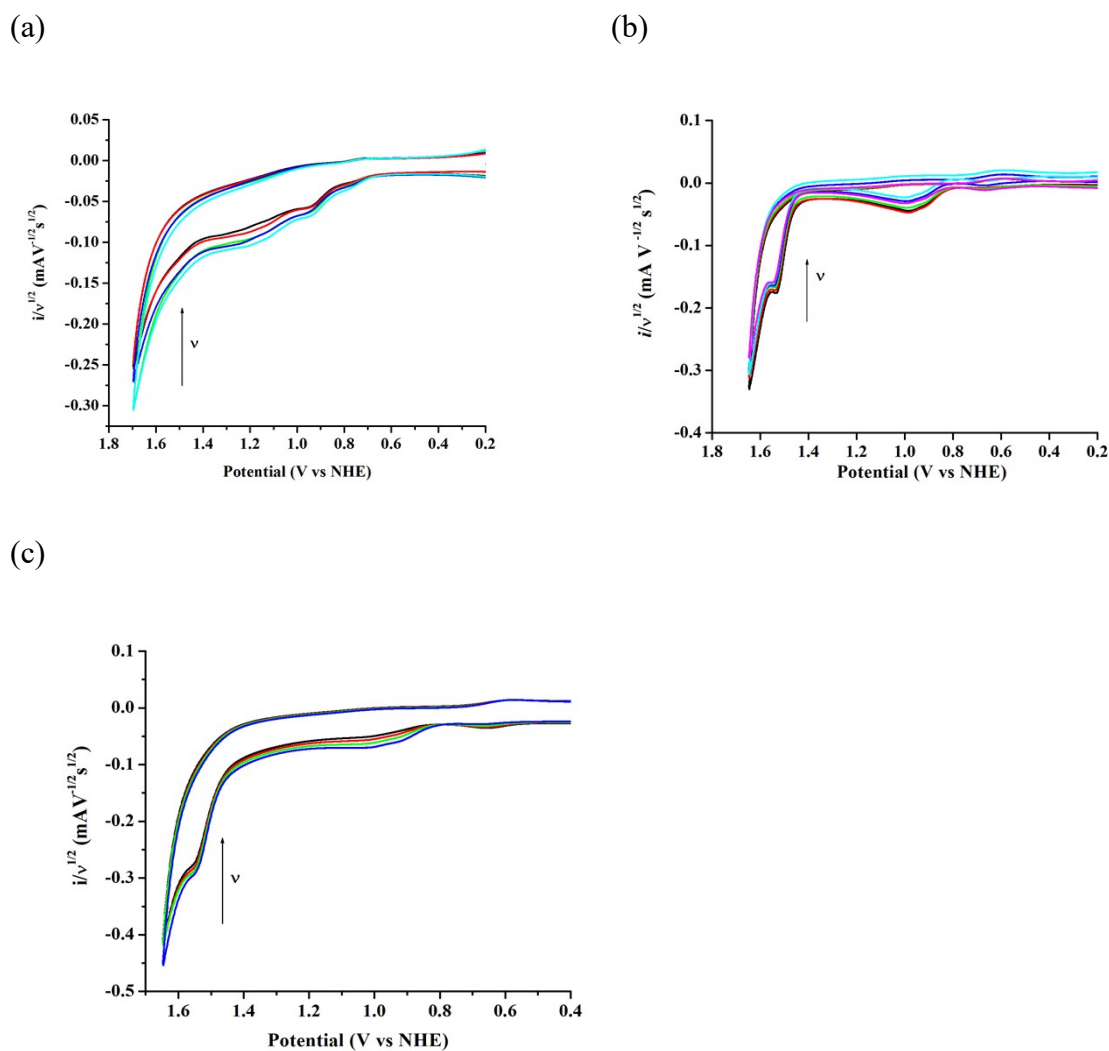

**Figure S30.** Scan rate normalised CV of (a) complex 1, (b) complex 2 and (c) complex 3 in 0.1 M neutral phosphate buffer.

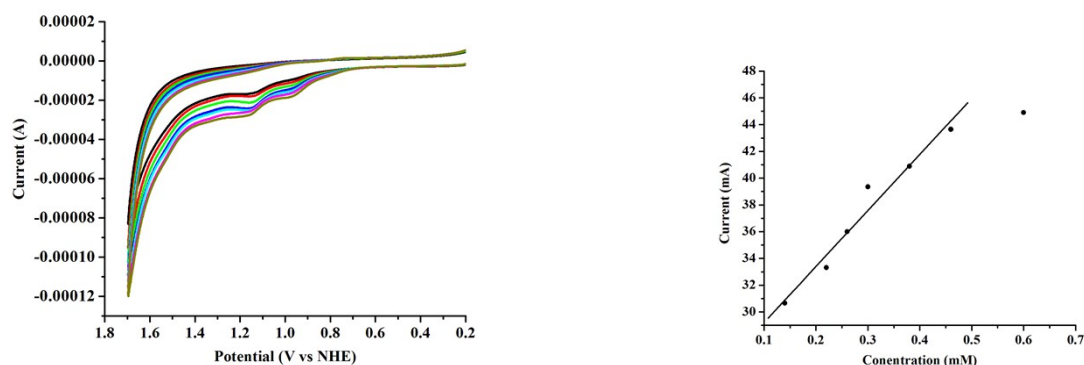

**Figure S31. (Left)** Background corrected CV of complex 1 at 0.14 (black), 0.22 (red), 0.26 (green), 0.30 (blue), 0.38 (cyan), 0.46 (magenta), 0.60 mM (olive), concentration in 0.1 M neutral phosphate buffer. Scan rate: 100 mV/s. **(Right)** Catalytic current at 1.51 V as a function of the catalyst concentration from 0.14 to 0.60 mM measured in 0.1 M neutral phosphate buffer.

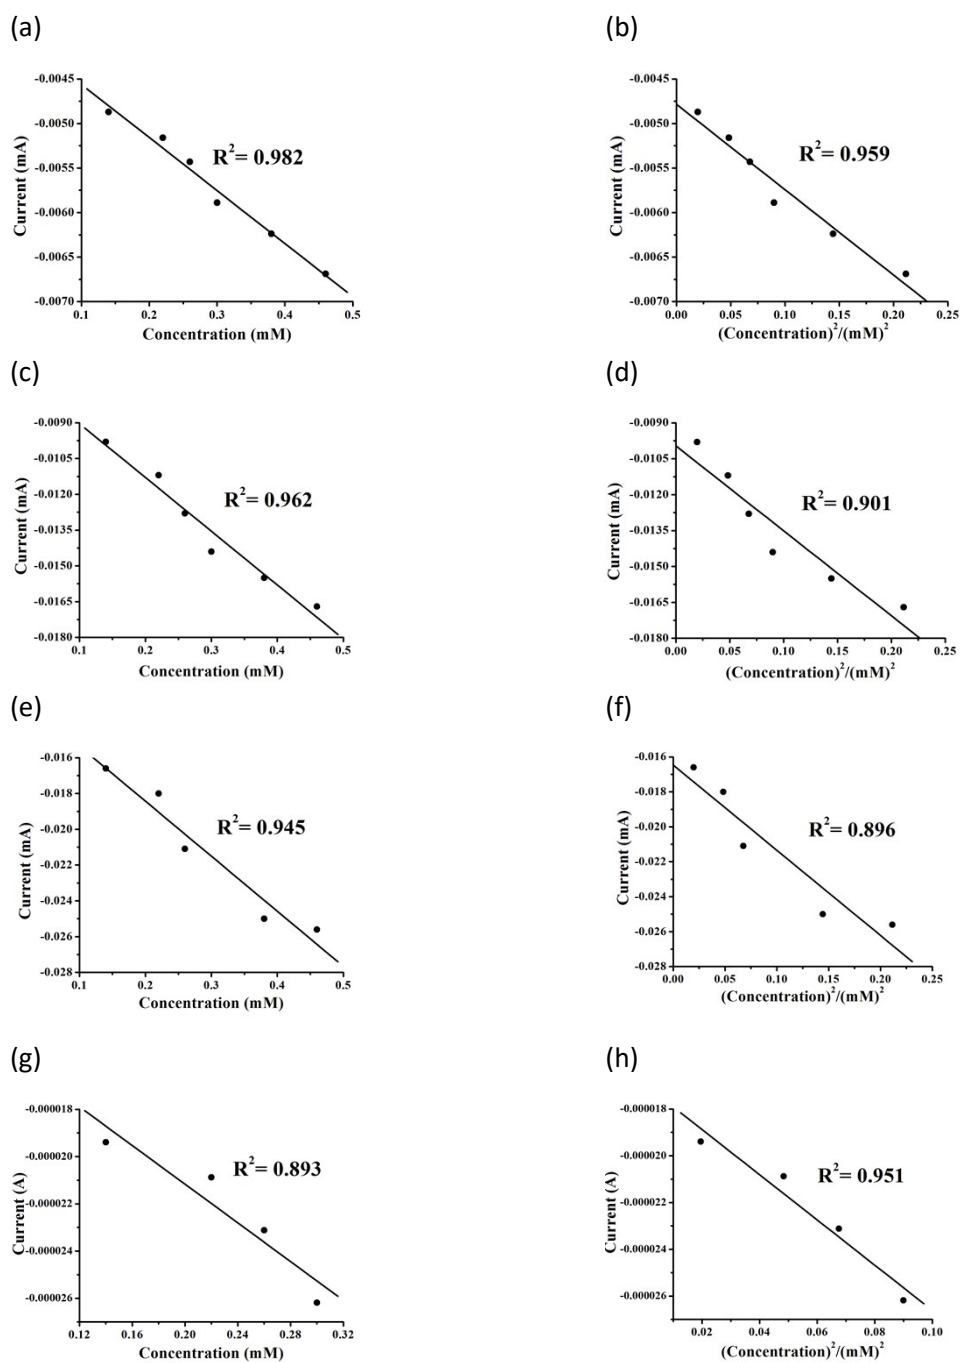

**Figure. S32**Plot of current vs. concentration at +0.76V (a), +0.89V (c), +0.97V (e) and +1.08V (g).Plot of current vs. square of concentration at +0.76V (b), +0.89V (d), +0.97V (f) and +1.08V (h) for complex 1.

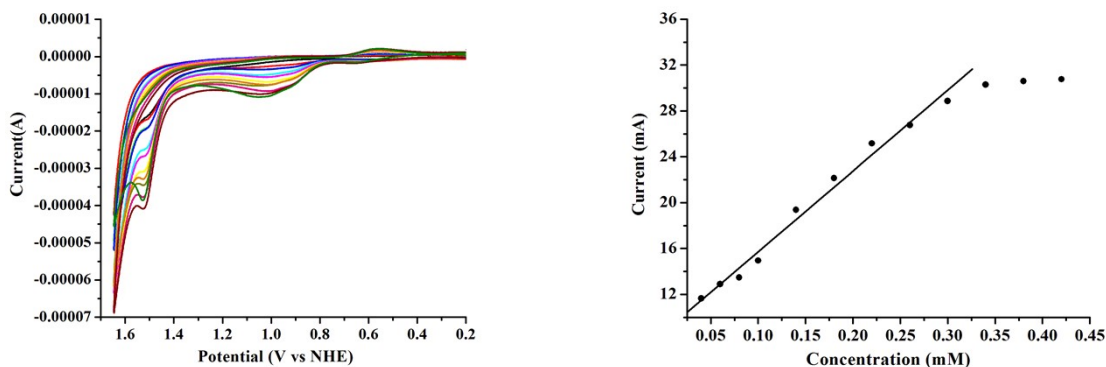

**Figure S33. (Left)** Background corrected CV of complex **3** at 0.04 (Black) 0.06 (red), 0.08 (green), 0.10 (dark blue), 0.14 (light blue), 0.18 (magenta), 0.22 (yellow), 0.26 (dark yellow), 0.30 (orange), 0.34 (pink), 0.38 (wine), 0.42 (olive) mM concentration in 0.1 M neutral phosphate buffer. Scan rate: 100mV/s. **(Right)** Plot of catalytic current at 1.52 V against the concentration of the catalyst for complex **3**

(a)

(b)

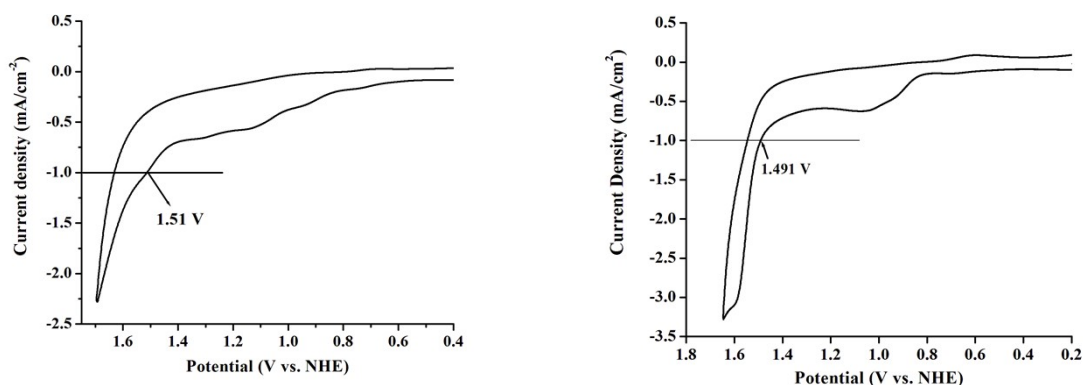

(c)

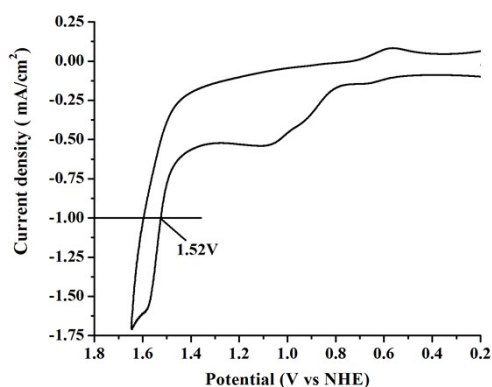

**Figure S34.** Background corrected CV of complex **1** (a), complex **2** (b) and complex **3** (c) recorded at 1mM concentration in 0.1 M neutral phosphate buffer at 100mV/sec scan rate. The current density of 1mA/cm<sup>2</sup> was obtained at 1.51V, 1.49V and 1.52 V for complex **1**, **2** and **3** respectively.



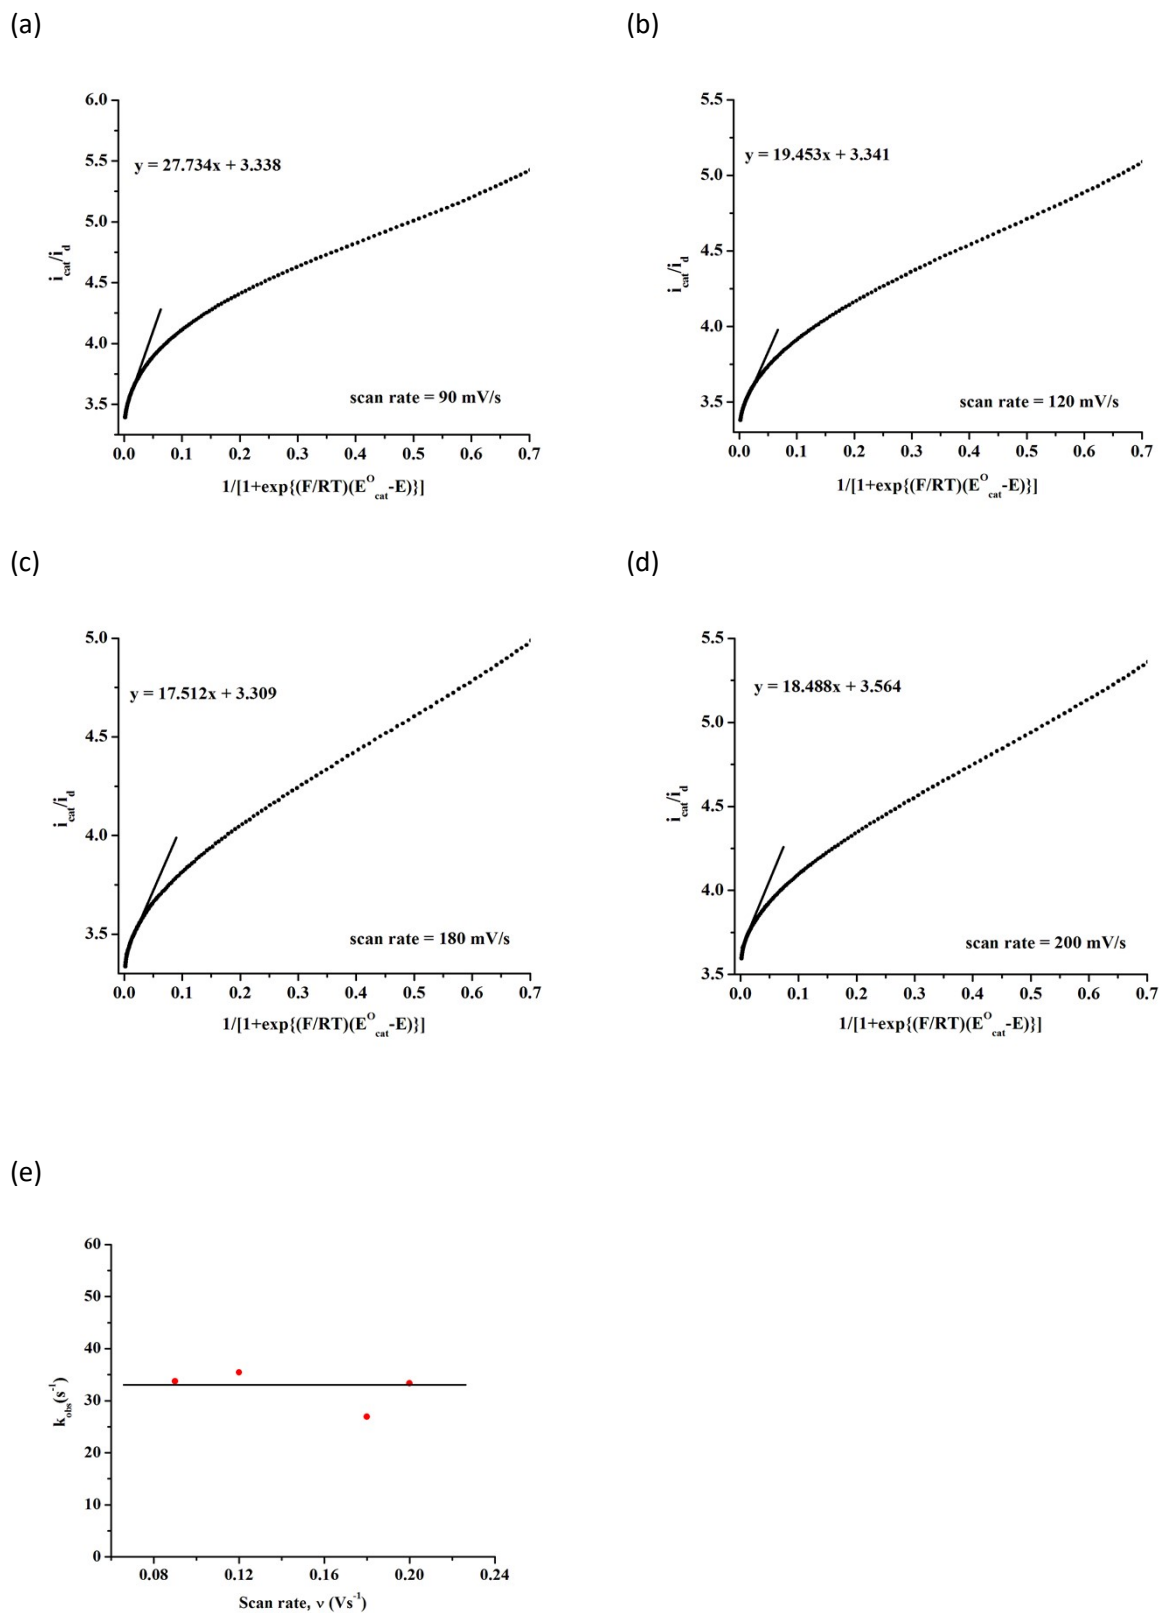

**FigureS35** (a) to (d) FOWA for complex 1. (e) Plot of the different  $k_{\text{obs}}$  values extracted from the foot-of-the-wave analysis at scan rate 90–200 mVs<sup>-1</sup>. The black line represents the average  $k_{\text{obs}}$  value (~32 s<sup>-1</sup>).

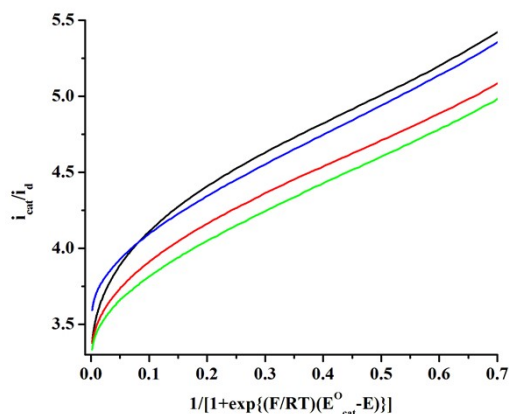

**Figure S36.** Foot-of-the-wave analysis plotting  $i_{cat}/i_d$  vs.  $1/[1+\exp\{(F/RT)(E_{cat}^o-E)\}]$  at 90 (black), 120 (red), 180 (green) and 200 (dark blue)  $\text{mVs}^{-1}$  scan rates for complex **1**.

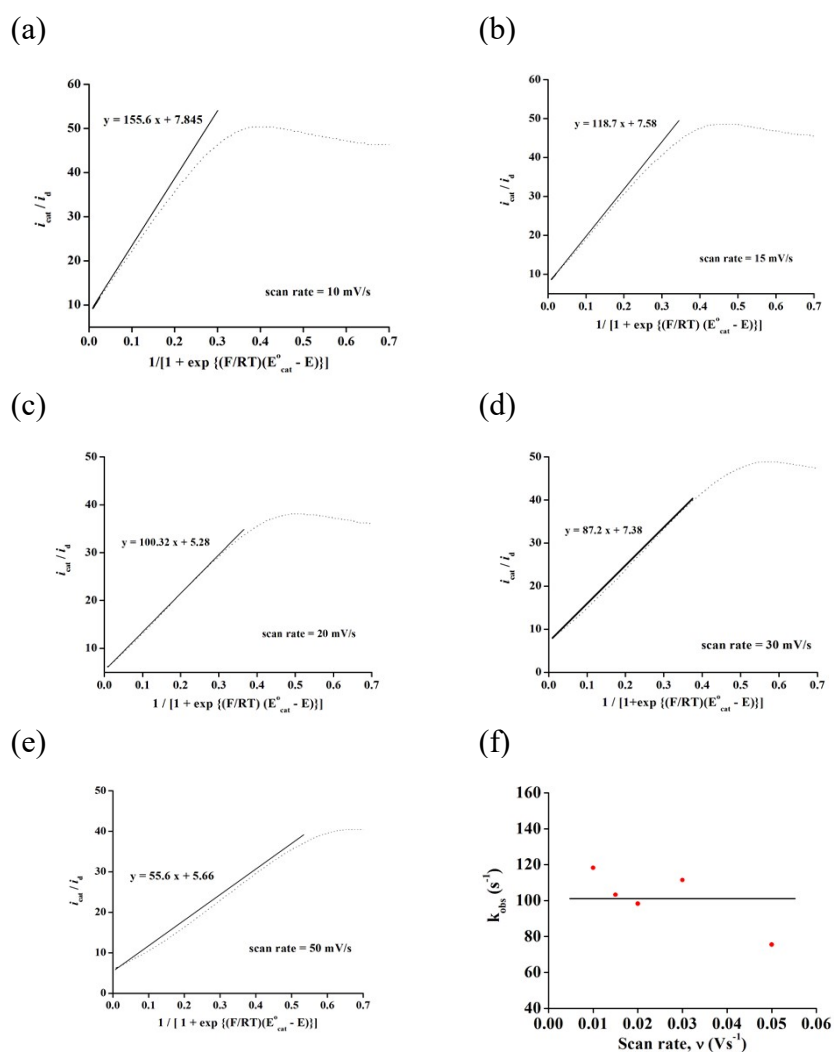

**Figure S37.** (a) to (e) FOWA. (f) Plot of the different  $k_{obs}$  values extracted from the foot-of-the-wave analysis at scan rate 10-50  $\text{mVs}^{-1}$  for complex **2**. In figure (f) the black line represents the average  $k_{obs}$  value ( $\sim 100 \text{ s}^{-1}$ ).

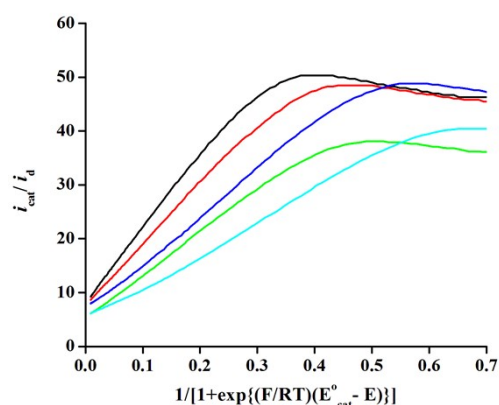

**Figure S38**Foot-of-the-wave analysis plotting  $i_{cat}/i_d$  vs.  $1/[1+\exp\{(F/RT)(E^o_{cat}-E)\}]$  at 10 (black), 15 (red), 20 (green), 30 (dark blue) and 50 (cyan)  $\text{mVs}^{-1}$  scan rates for complex **2**

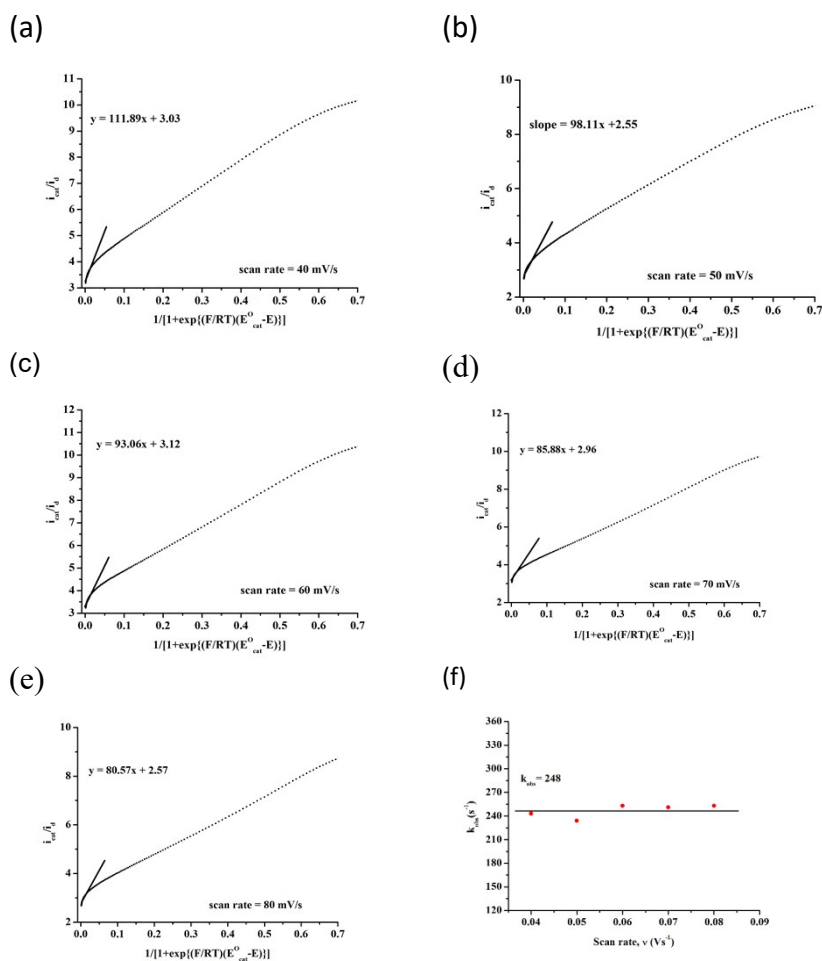

**Figure S39.** (a) to (e) FOWA for complex **2**. (f) Plot of the different  $k_{obs}$  values extracted from the foot-of-the-wave analysis at scan rate 40-80  $\text{mVs}^{-1}$  for complex **3**. The black line represents the average  $k_{obs}$  value ( $\sim 248 \text{ s}^{-1}$ ).

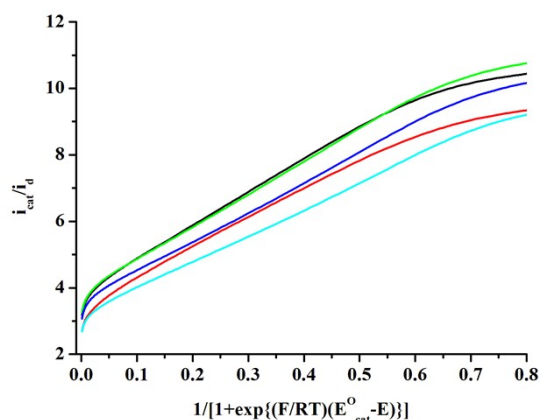

**Figure S40.** Foot-of-the-wave analysis plotting  $i_{cat}/i_d$  vs.  $1/[1+\exp\{(F/RT)(E^o_{cat}-E)\}]$  at 40 (black), 50 (red), 60 (green), 70 (dark blue) and 80 (cyan)  $mVs^{-1}$  scan rates for complex **3**.

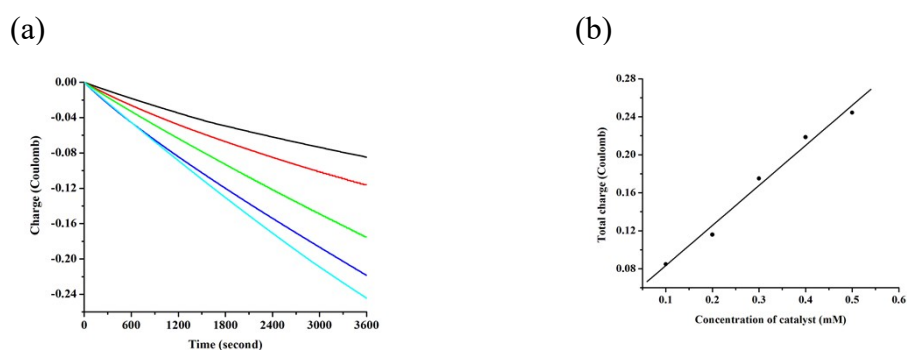

**Figure S41.** (a) Plot of charge vs. time recorded during bulk electrolysis of complex **1** at 0.1mM (black), 0.2mM (red), 0.3mM (green), 0.4mM (dark blue) and 0.5mM (light blue) concentration at 1.51 V vs. NHE in 0.1 M neutral phosphate buffer. (b) Plot of total charge vs. concentration of complex **1** after 1h of electrolysis

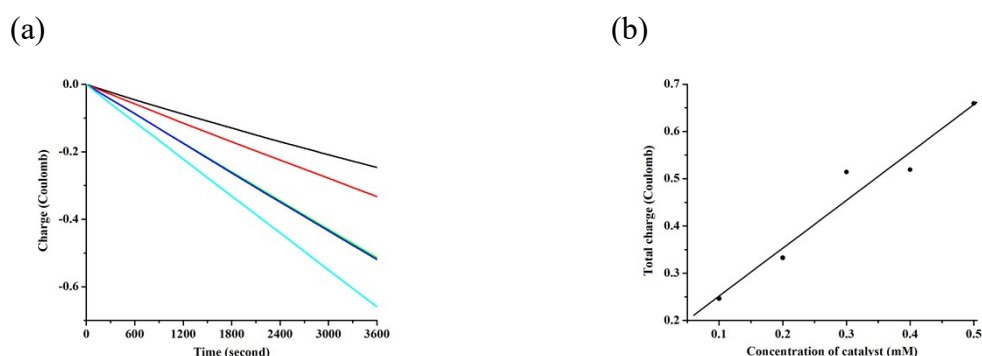

**Figure.S42** (a) Plot of charge vs. time recorded during bulk electrolysis of complex **2** at 0.1mM (black), 0.2mM (red), 0.3mM (green), 0.4mM (dark blue) and 0.5mM (light blue) concentration at 1.49 V vs. NHE in 0.1 M neutral phosphate buffer. (b) Plot of total charge vs. concentration of complex **2** after 1h of electrolysis.

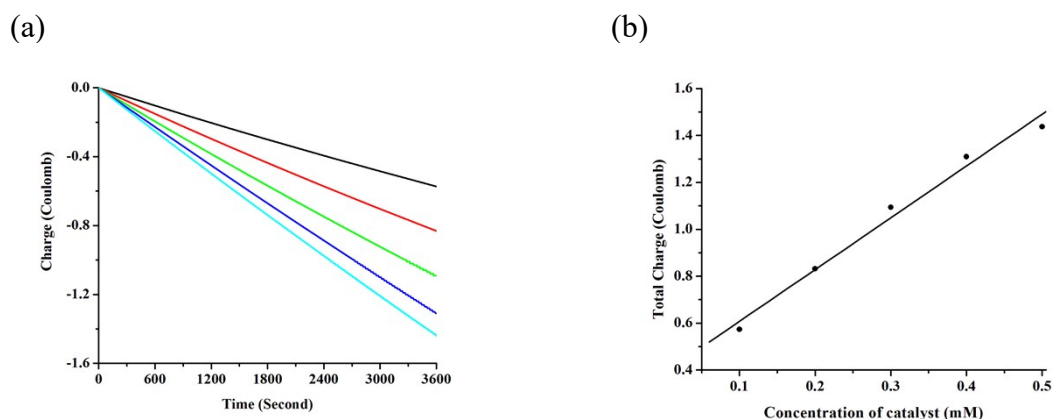

**Figure.S43 (a)** Plot of charge vs. time recorded during bulk electrolysis of complex **3** at 0.1mM (black), 0.2mM (red), 0.3mM (green), 0.4mM (dark blue) and 0.5mM (light blue) concentration at 1.52 V vs. NHE in 0.1 M neutral phosphate buffer. **(b)** Plot of total charge vs. concentration of complex **3** after 1h of electrolysis.

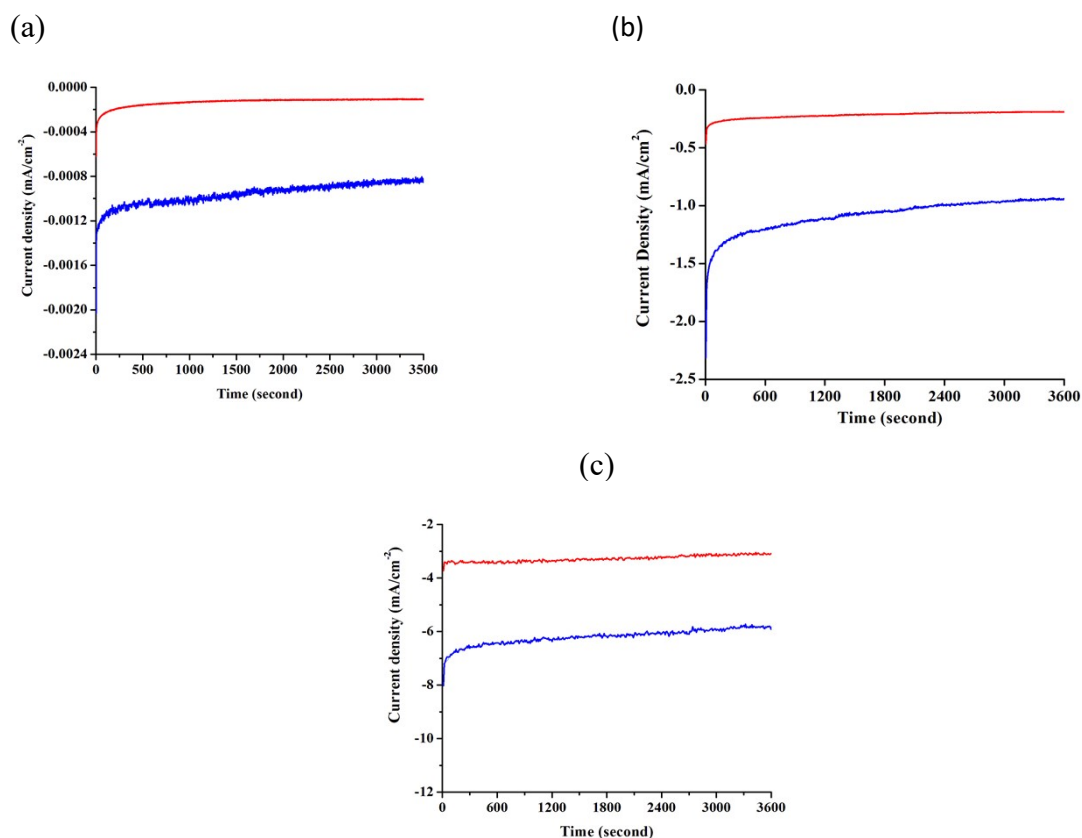

**Figure S44.** Plot of current density vs. time obtained from bulk electrolysis experiment with (blue line) and without (red line) complex **1**(a), complex **2** (b) and complex **3** (c) in 0.1 M neutral phosphate buffer using ITO working electrode (area 4 cm<sup>2</sup>) at 1.51 V, 1.49 V and 1.52 V respectively

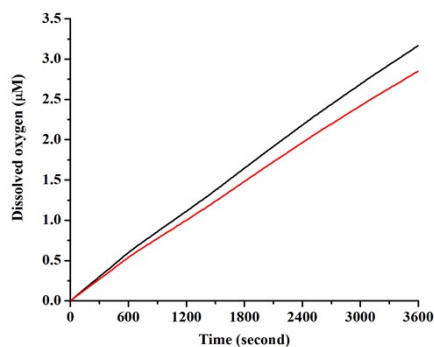

**Figure S45.** Plot of concentration of Oxygen evolved against time during bulk electrolysis experiment at 1.52 V versus NHE with complex **1** in 0.1 M neutral phosphate buffer (red line). The black line indicates the theoretical amount of oxygen as assumed by charge passed with 100% faradaic efficiency.

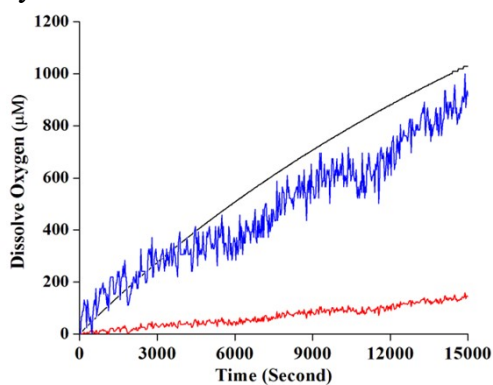

**Figure S46.** Plot of concentration of Oxygen evolved against time during bulk electrolysis experiment at 1.49 V versus NHE with (blue line) and without (red line) complex **2** in 0.1 M neutral phosphate buffer. The black line indicates the theoretical amount of oxygen as assumed by charge passed with 100% faradaic efficiency.

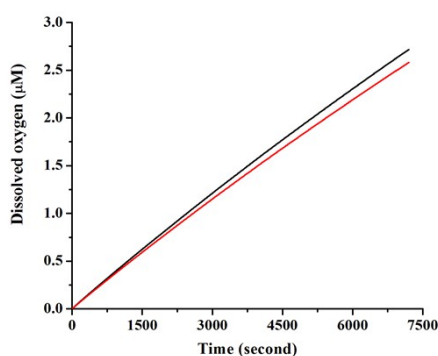

**Figure S47.** Plot of concentration of Oxygen evolved against time during bulk electrolysis experiment at 1.52 V versus NHE with complex **3** in 0.1 M neutral phosphate buffer (red line). The black line indicates the theoretical amount of oxygen as assumed by charge passed with 100% faradaic efficiency.

(a)

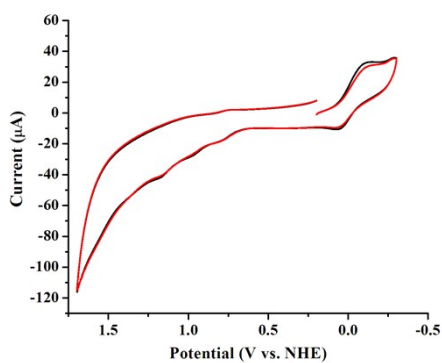

(b)

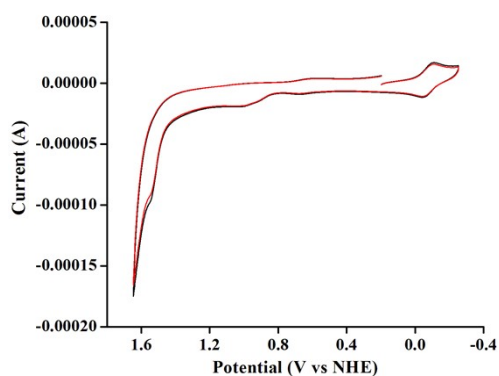

(c)

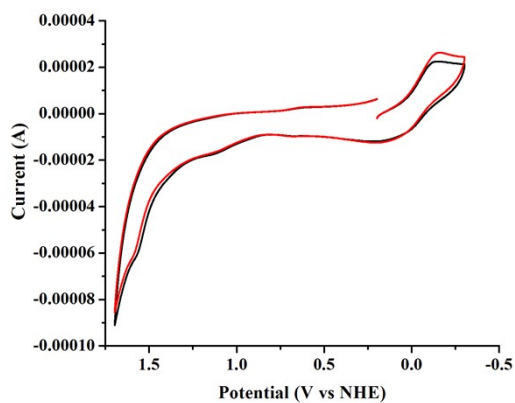

**Figure S48.** (a) Cyclic voltammogram of complex **1** before (black line) and after (red line) electrolysis at 1.51 V vs. NHE in 0.1 M neutral phosphate buffer. (b) Cyclic voltammogram of complex **2** before (black line) and after (red line) electrolysis at 1.49 V vs. NHE in 0.1 M neutral phosphate buffer. (c) Cyclic voltammogram of complex **3** before (black line) and after (red line) electrolysis at 1.52 V vs. NHE in 0.1 M neutral phosphate buffer.

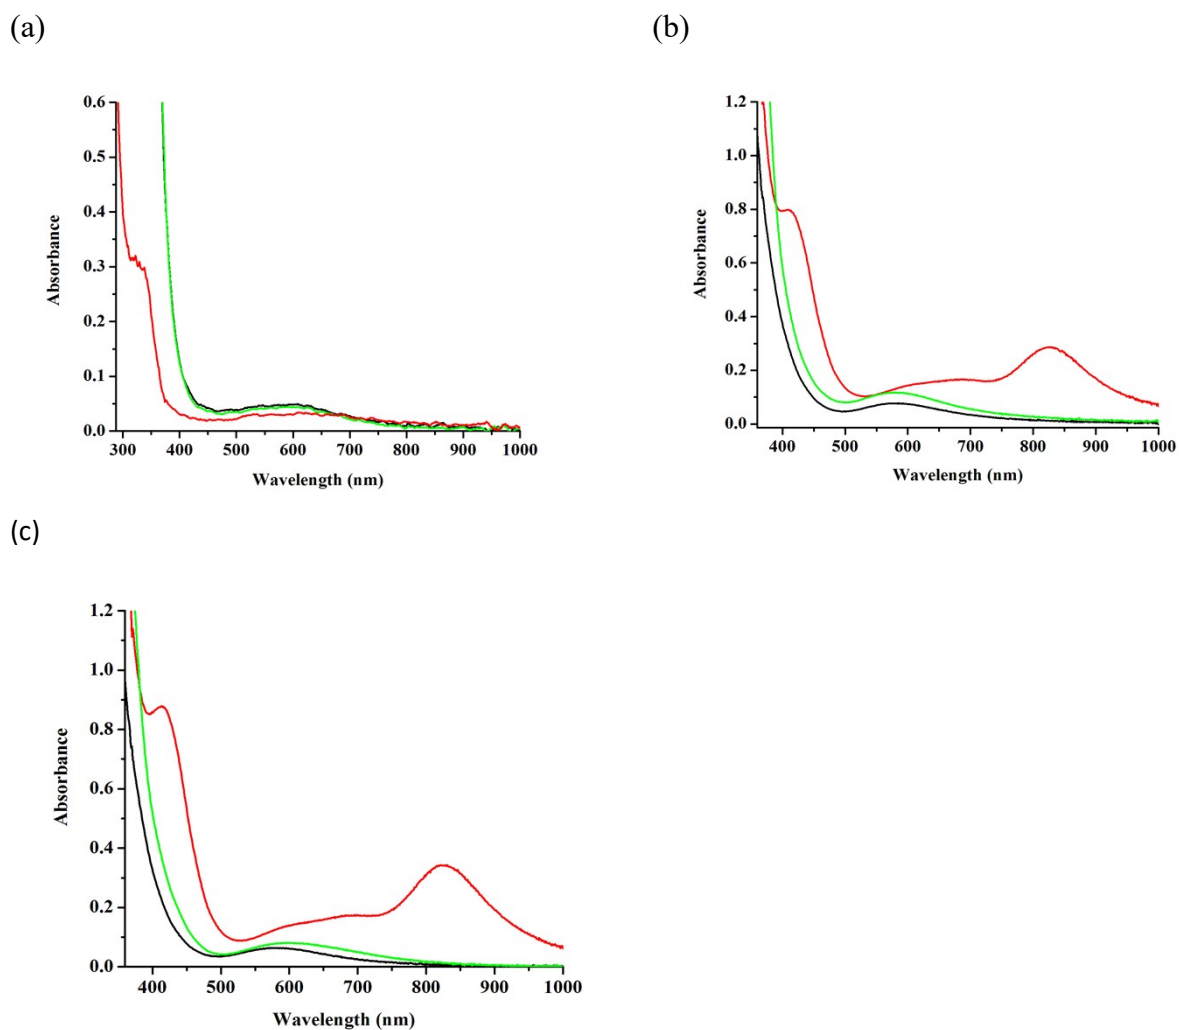

**Figure S49.** (a) UV-visible spectra of complex 1 before electrolysis (black), just after completion of electrolysis (red) and after 1h of completion of electrolysis (green) at 1.51 V vs. NHE in 0.1 M neutral phosphate buffer. (b) UV-visible spectra of complex 2 before electrolysis (black), just after completion of electrolysis (red) and after 1h of completion of electrolysis (green) at 1.49 V vs. NHE in 0.1 M neutral phosphate buffer. (c) UV-visible spectra of complex 3 before electrolysis (black), just after completion of electrolysis (red) and after 1h of completion of electrolysis (green) at 1.52 V vs. NHE in 0.1 M neutral phosphate buffer.



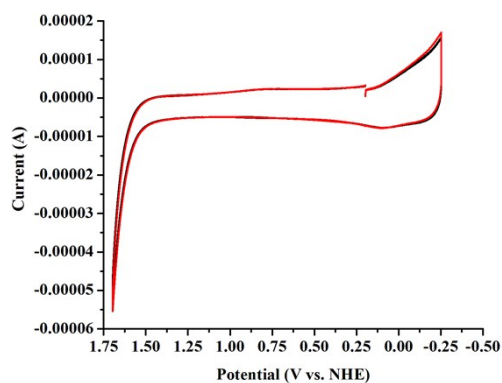

**Figure S50.** Cyclic voltammogram recorded in 0.1 M neutral phosphate buffer with fresh (black line) and used (red line) ITO working electrode (area 4 cm<sup>2</sup>) for complex **1**

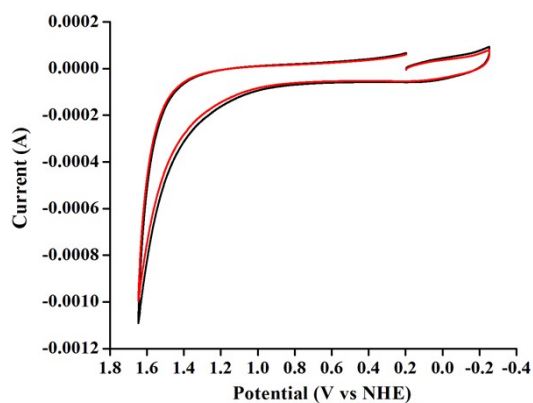

**Figure S51.** Cyclic voltammogram recorded in 0.1 M neutral phosphate buffer with fresh (black line) and used (red line) ITO working electrode (area 4 cm<sup>2</sup>) for complex **2**

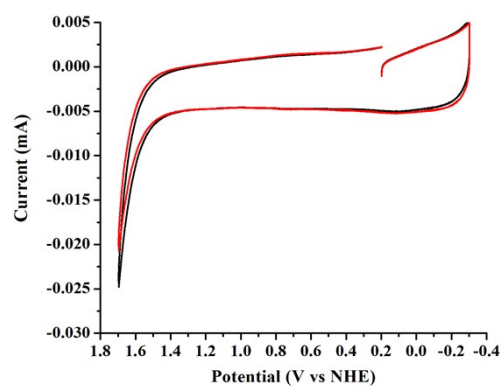

**Figure S52.** Cyclic voltammogram recorded in 0.1 M neutral phosphate buffer with fresh (black line) and used (red line) ITO working electrode (area 4 cm<sup>2</sup>) for complex **3**.

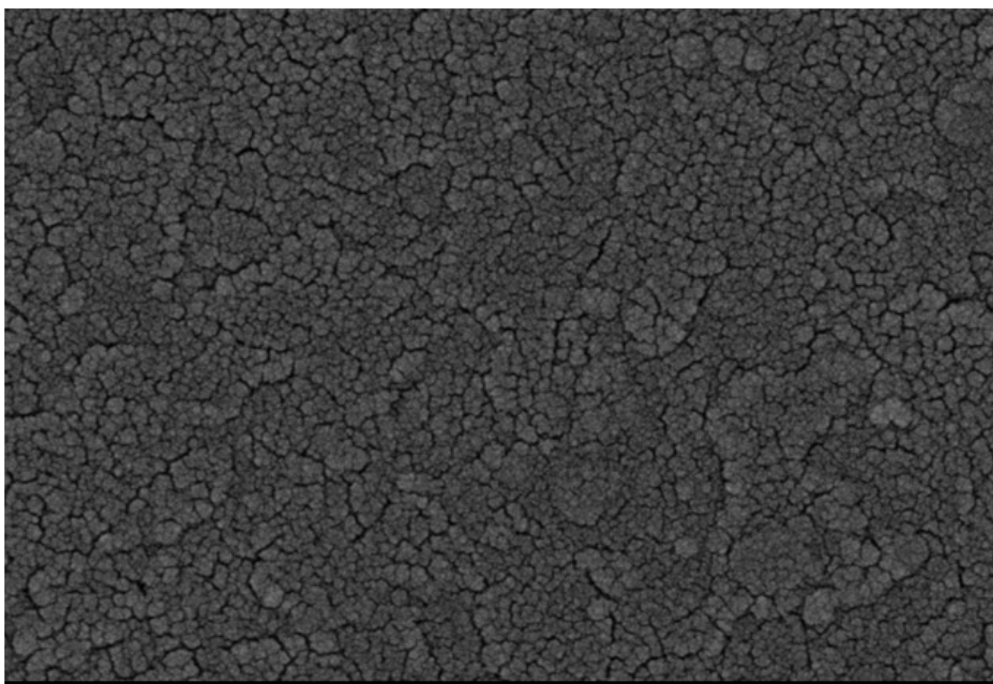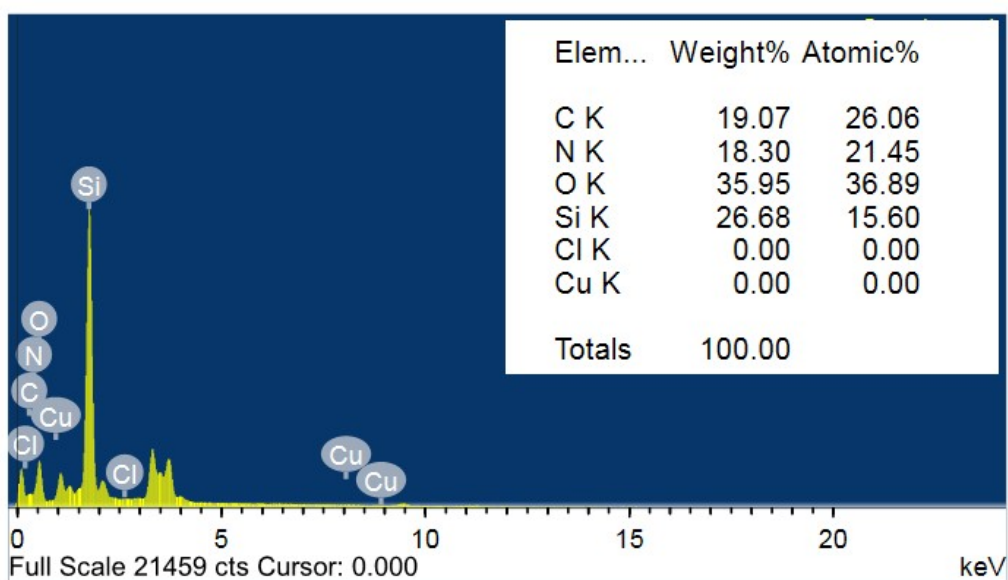

OXFORD  
INSTRUMENTS  
*The Business of Science®*

**Figure S53.**FE-SEM and EDX plot of fresh ITO sample before electrolysis experiment of complex1 in neutral phosphate buffer.

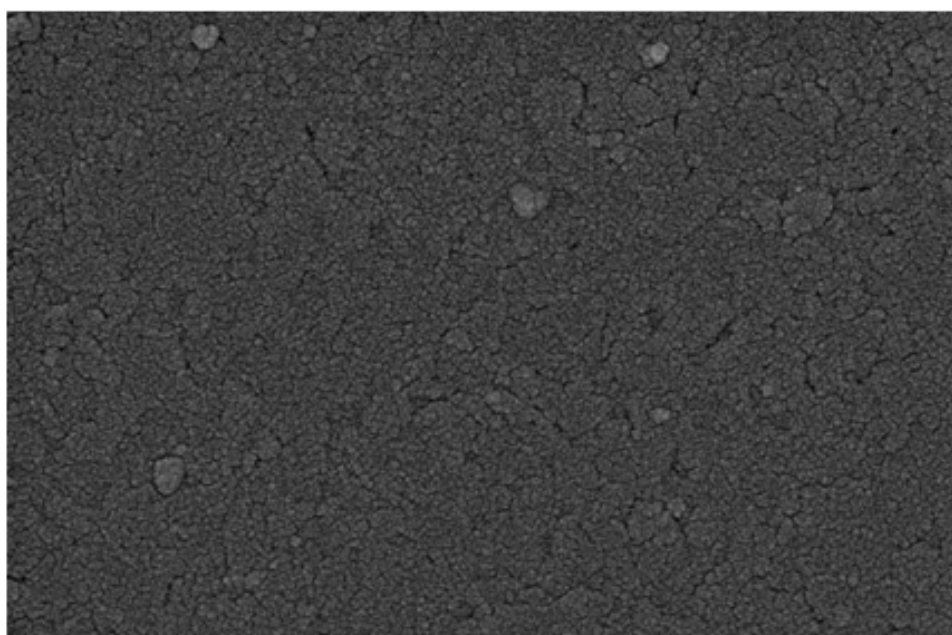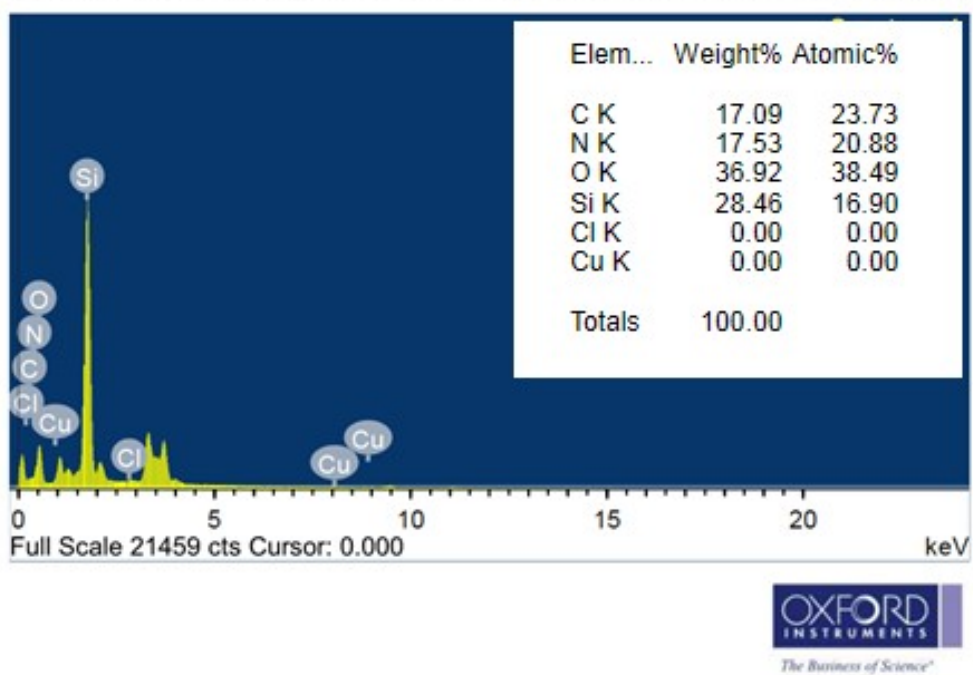

**FigureS54** FE-SEM and EDX plot of used ITO sample after electrolysis experiment of complex 1 in neutral phosphate buffer.

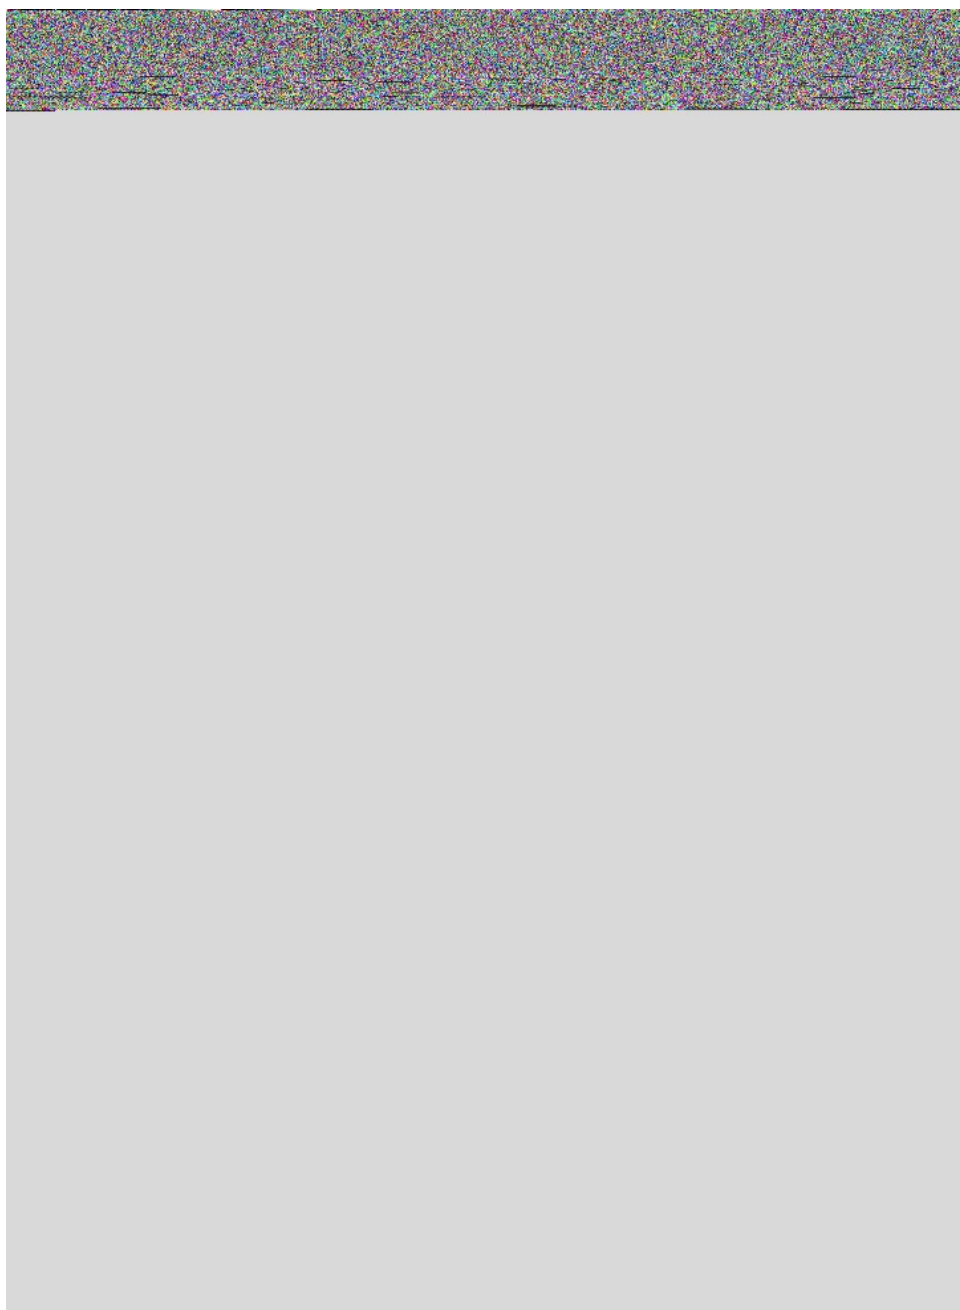

**Figure S55**FE-SEM and EDX plot of fresh ITO sample before electrolysis experiment of complex **2** in neutral phosphate buffer.

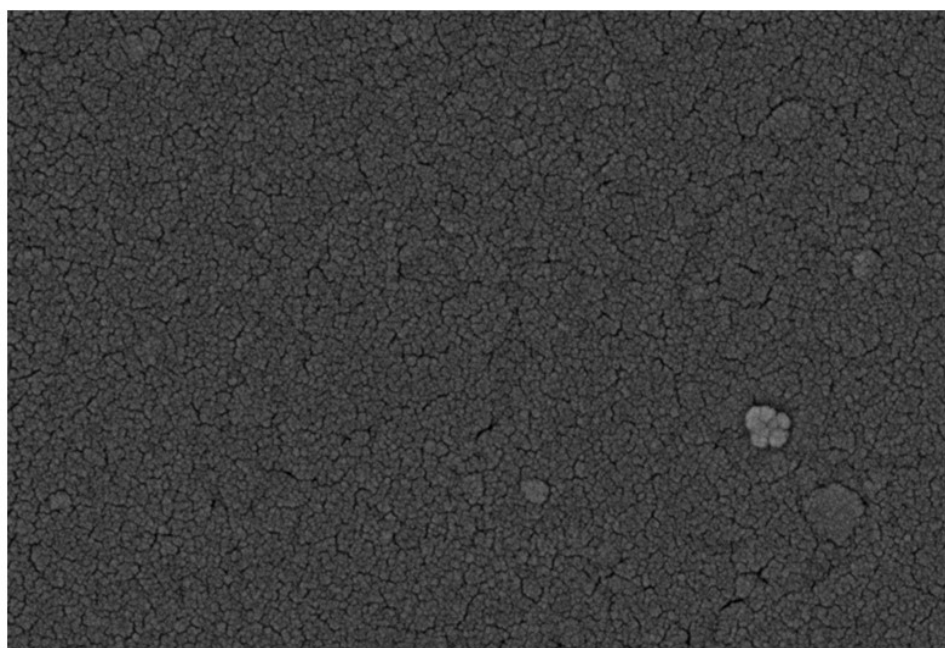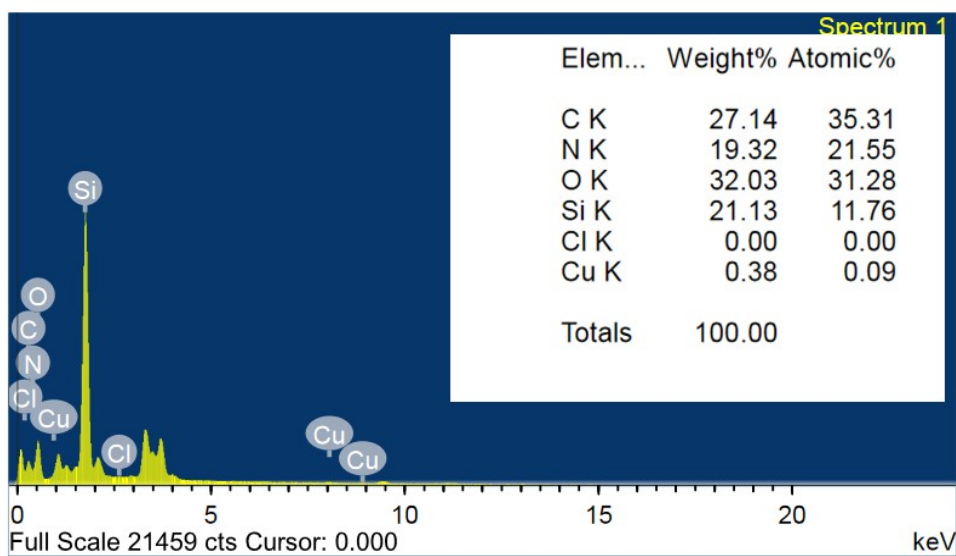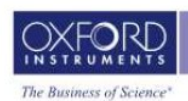

**Figure S56.** FE-SEM and EDX plot of used ITO sample after electrolysis experiment of complex **2** in neutral phosphate buffer.

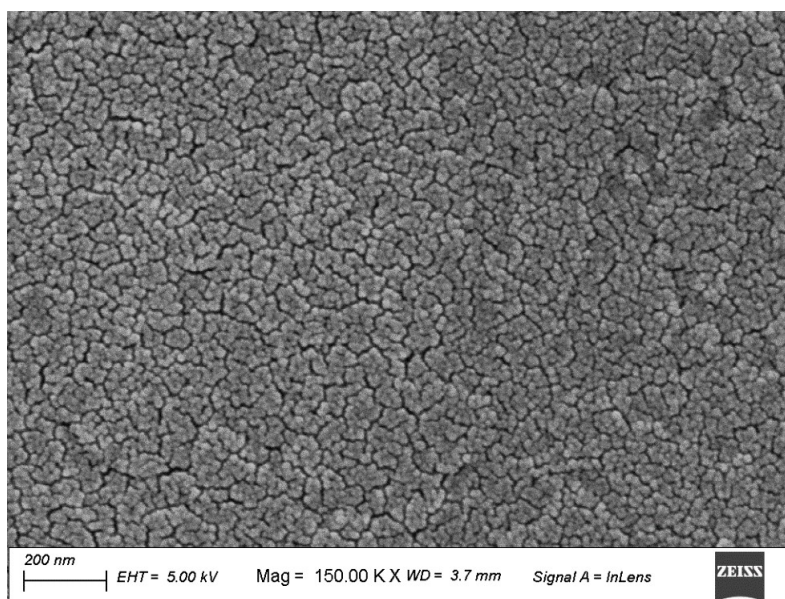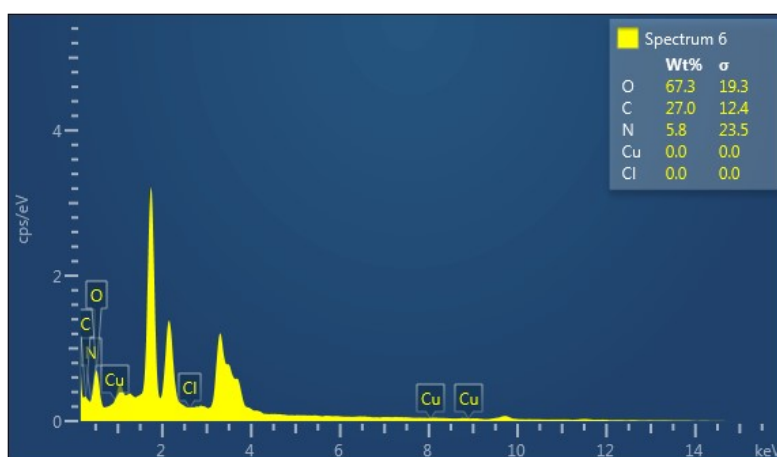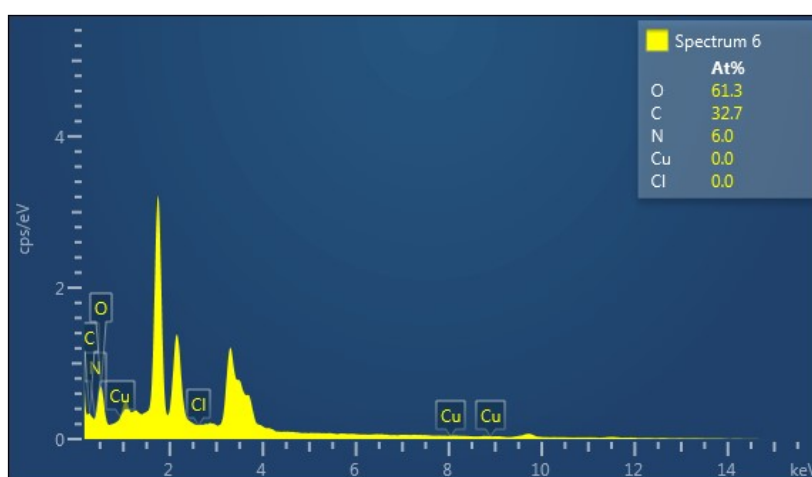

**Figure S57.** FE-SEM and EDX plot of fresh ITO sample before electrolysis experiment of complex **3** in neutral phosphate buffer.

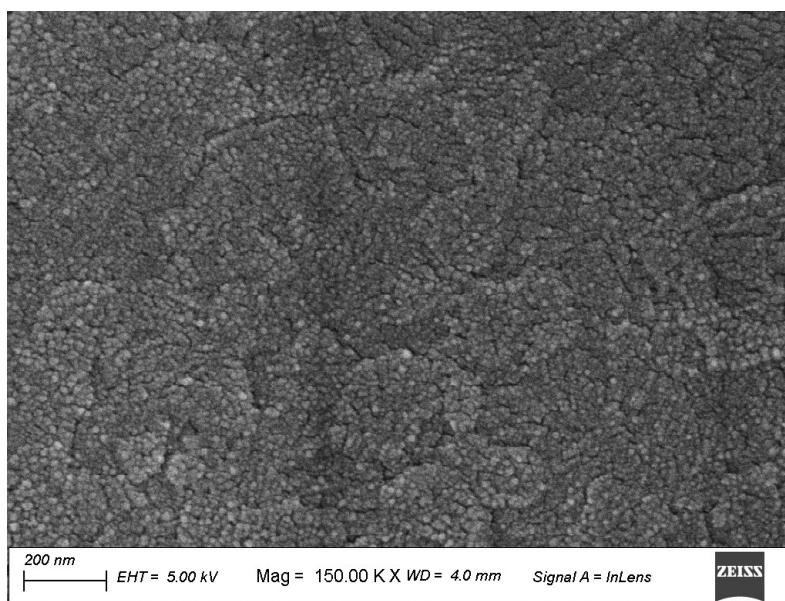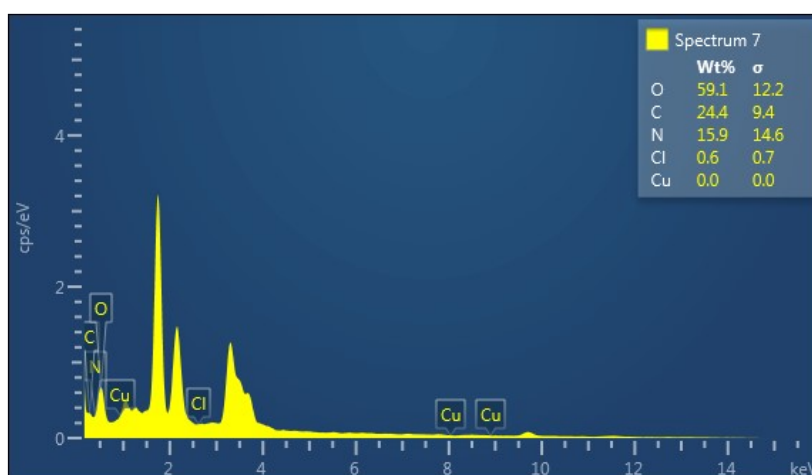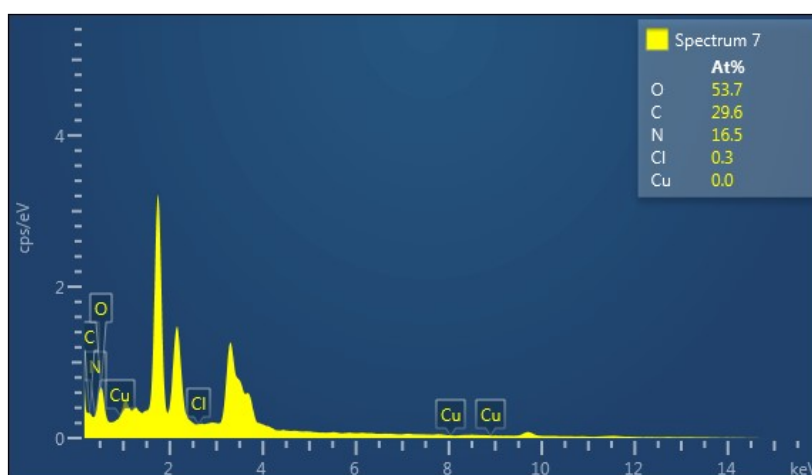

**Figure S58.**FE-SEM and EDX plot of used ITO sample after electrolysis experiment of complex **3** in neutral phosphate buffer.

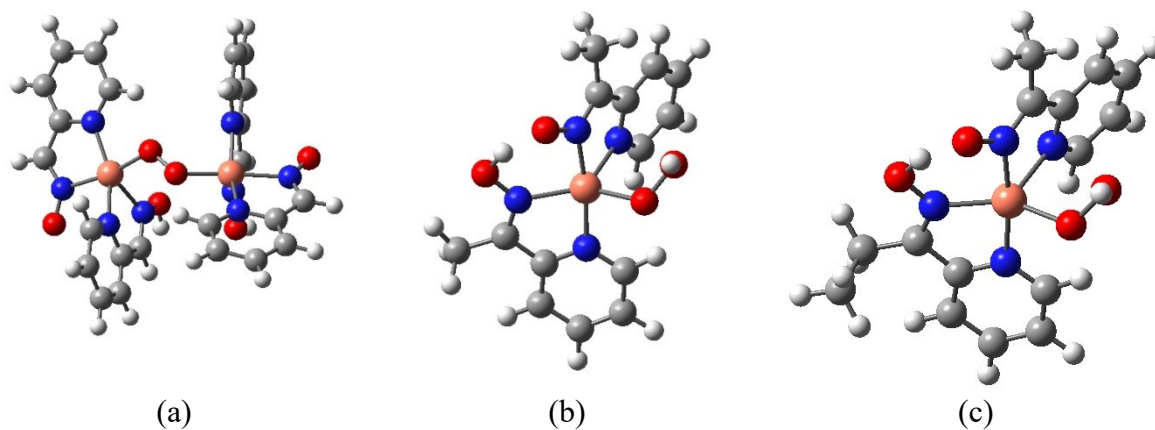

**Figure S59.** DFT optimised structure of metal peroxo intermediates generated from (a) Complex 1, (b) Complex 2 and (c) Complex 3.

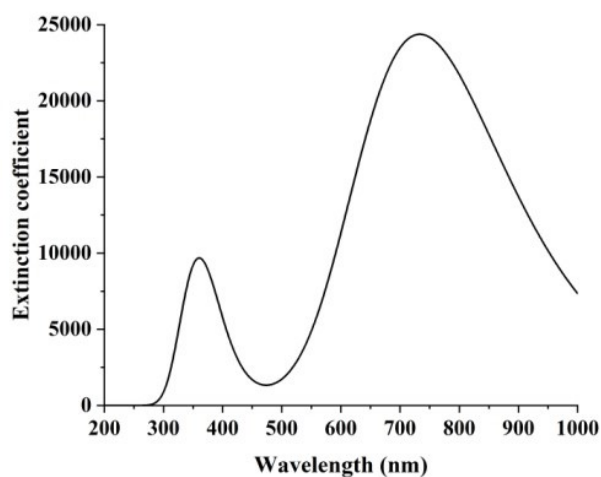

**Figure S60.** UV-visible spectrum obtained from TDDFT calculations carried out on the DFT optimized structures of metal peroxo intermediates generated from complex 1 during its catalytic cycle. Peak at 358 nm is assigned for the electronic transition from HOMO-20 to LUMO.



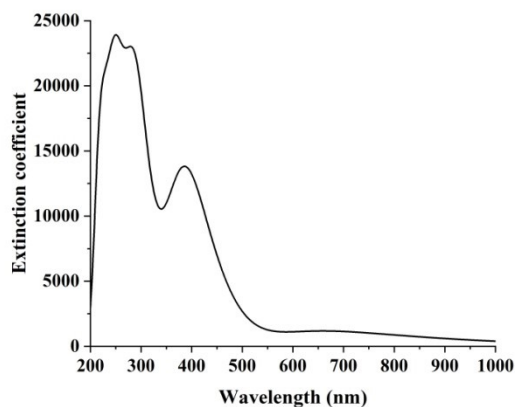

**Figure S61.** UV-visible spectrum obtained from TDDFT calculations carried out on the DFT optimized structures of metal peroxo intermediates generated from complex 2 during its catalytic cycle. Peak at 385 nm is assigned for the electronic transition from HOMO-1 to LUMO.

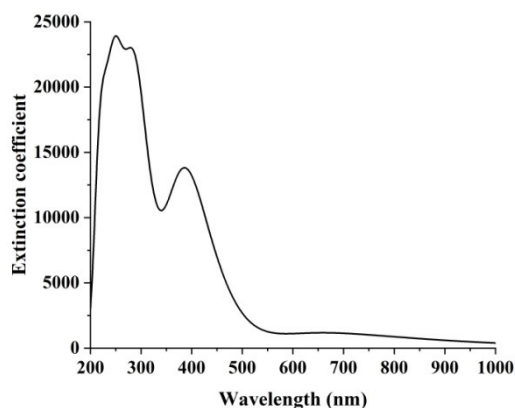

**Figure S62.** UV-visible spectrum obtained from TDDFT calculations carried out on the DFT optimized structures of metal peroxo intermediates generated from complex 3 during its catalytic cycle. Peak at 387 nm is assigned for the electronic transition from HOMO-1 to LUMO.

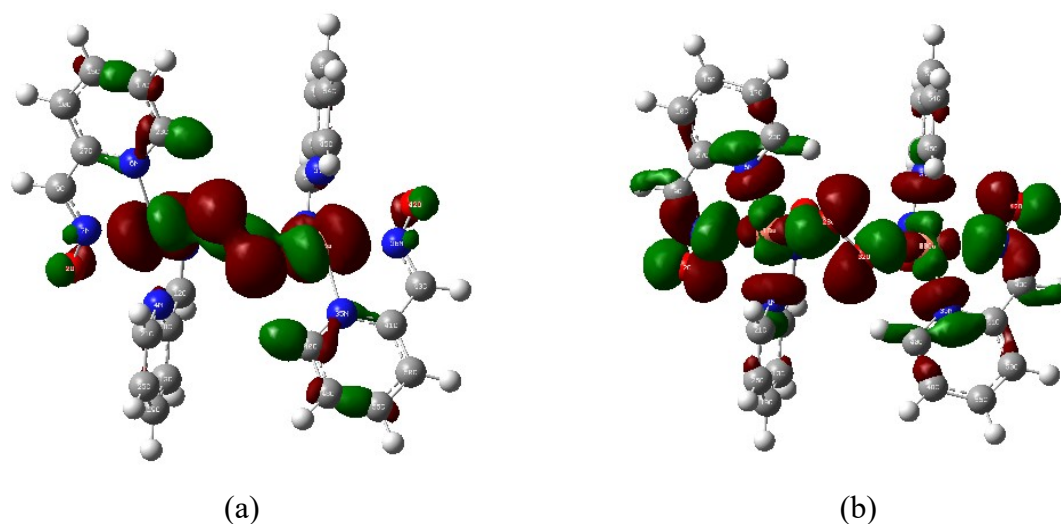

**Figure S63.** (a) Boundary surface diagram of HOMO-20 orbital calculated from the DFT optimized structure of the metal peroxo intermediated generated from complex **1** showing interaction between  $\pi^*$  orbital of the peroxide ion with a d orbital of the metal center. (b) Boundary surface diagram of LUMO calculated from the DFT optimized structure of the metal peroxo intermediated generated from complex **1**.

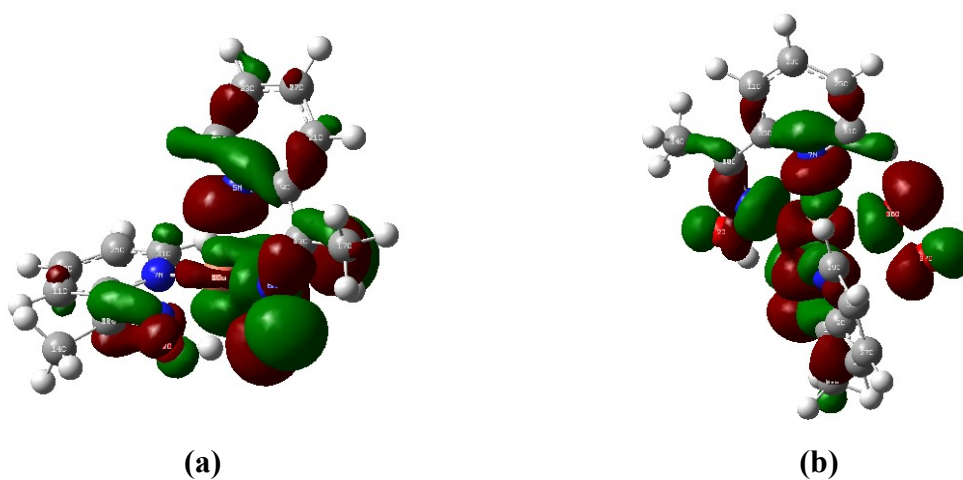

**Figure S64.** (a) Boundary surface diagram of HOMO-1 orbital calculated from the DFT optimized structure of the metal peroxo intermediated generated from complex **2** showing interaction between  $\pi^*$  orbital of the peroxide ion with a d orbital of the metal center. (b) Boundary surface diagram of LUMO calculated from the DFT optimized structure of the metal peroxo intermediated generated from complex **2**.

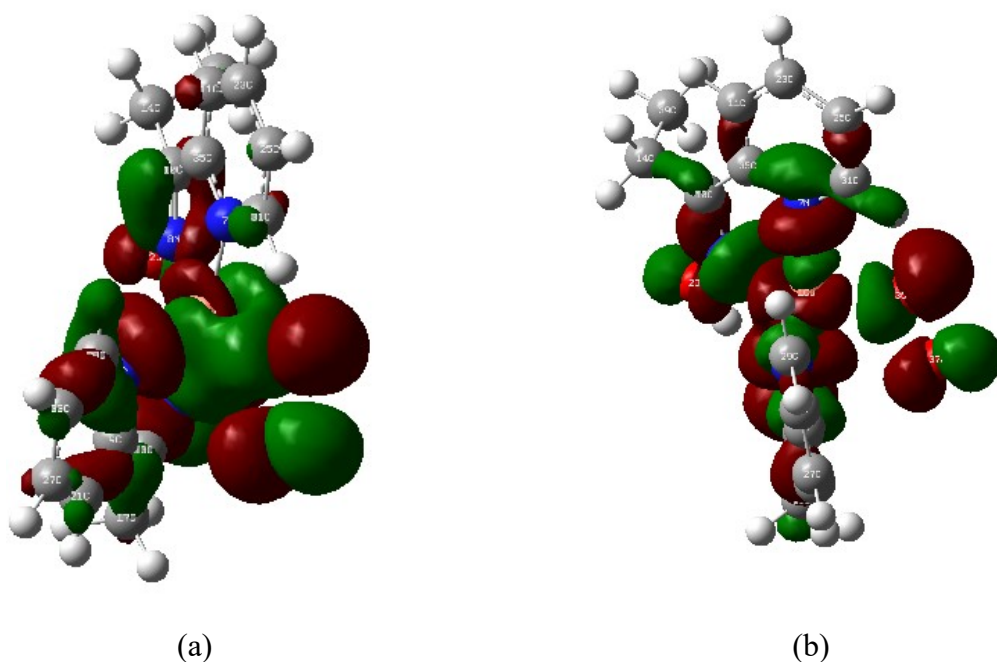

**Figure S65.** (a) Boundary surface diagram of HOMO-1 orbital calculated from the DFT optimized structure of the metal peroxo intermediated generated from complex **3** showing interaction between  $\pi^*$  orbital of the peroxide ion with a d orbital of the metal center. (b) Boundary surface diagram of LUMO calculated from the DFT optimized structure of the metal peroxo intermediated generated from complex **3**.

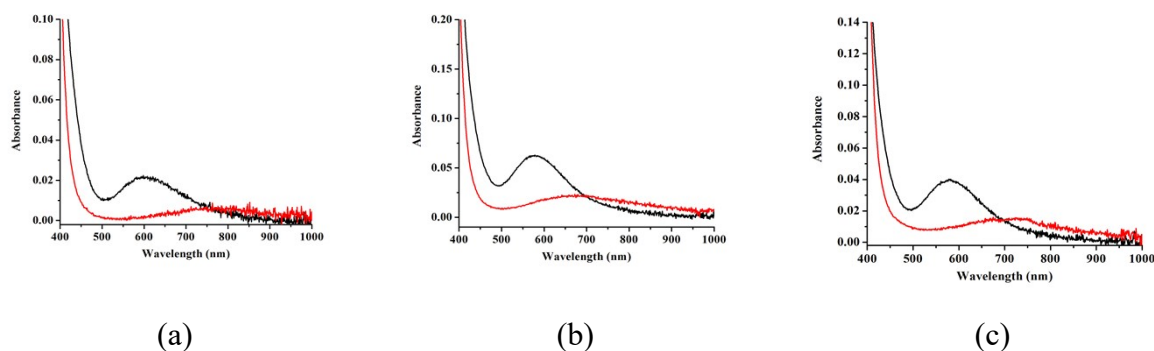

**Figure S66** (a) UV-visible spectra of complex **1** before (black line) and after (red line) reaction with Ceric ammonium nitrate in aqueous medium. (b) UV-visible spectra of complex **2** before (black line) and after (red line) reaction with Ceric ammonium nitrate in aqueous medium. (c) UV-visible spectra of complex **3** before (black line) and after (red line) reaction with Ceric ammonium nitrate in aqueous medium.

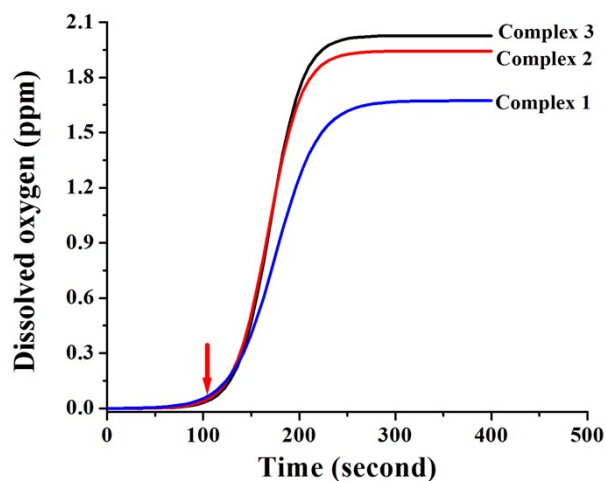

**Figure S67.** Plot of concentration of Oxygen evolved against time after addition of 10 ml degassed 1 mM aqueous solution of the metal complexes to 40 mL degassed 100 mM aqueous solution of Cerium ammonium nitrate (CAN) in a gas-tight cell equipped with magnetic stirring bar and calibrated Ocean Optics FOXY probe. The arrow corresponds to the point of addition of the complex solution.

**Table S1.** Total charge passed through working electrode after 1h of electrolysis of complex 1, 2 and 3 at the  $E_{cat}$  potential.

| Concentration of the catalysts (mM) | Total Charge of the catalyst after 1h of bulk electrolysis (Coulomb) |           |           |
|-------------------------------------|----------------------------------------------------------------------|-----------|-----------|
|                                     | Complex 1                                                            | Complex 2 | Complex 3 |
| 0.1                                 | -0.084                                                               | -0.246    | -0.573    |
| 0.2                                 | -0.116                                                               | -0.332    | -0.831    |
| 0.3                                 | -0.175                                                               | -0.514    | -1.093    |
| 0.4                                 | -0.218                                                               | -0.519    | -1.309    |
| 0.5                                 | -0.244                                                               | -0.659    | -1.437    |

**Table S2.** Crystal data and structure refinement parameters for Complex 1, 2 and 3

|                         | Complex 1                | Complex 2                | Complex 3                |
|-------------------------|--------------------------|--------------------------|--------------------------|
| Empirical formula       | $CuN_4O_6C_{12}H_{10}Cl$ | $CuN_4O_7C_{14}H_{17}Cl$ | $CuN_4O_6C_{15}H_{17}Cl$ |
| Formula weight          | 405.23                   | 452.30                   | 448.32                   |
| Wavelength( $\lambda$ ) | 0.71073 Å                | 0.71073 Å                | 0.71073 Å                |
| Temperature             | 273(2) K                 | 293(2) K                 | 300(2) K                 |
| Crystal system          | Trigonal                 | Monoclinic               | Orthorhombic             |
| Space group             | $P3_121$                 | $Pc$                     | $P2_1 2_1 2_1$           |

|                                        |                                                                            |                                                                          |                                                                          |
|----------------------------------------|----------------------------------------------------------------------------|--------------------------------------------------------------------------|--------------------------------------------------------------------------|
| $a[\text{Å}]$                          | 8.5947(7)                                                                  | 6.3587(2)                                                                | 6.9279(6)                                                                |
| $b[\text{Å}]$                          | 8.5947(7)                                                                  | 15.7475(6)                                                               | 12.5890(11)                                                              |
| $c[\text{Å}]$                          | 17.7141(14)                                                                | 9.8349(4)                                                                | 20.2730(18)                                                              |
| $\alpha[^\circ]$                       | 90                                                                         | 90                                                                       | 90                                                                       |
| $\beta[^\circ]$                        | 90                                                                         | 101.219(2)                                                               | 90                                                                       |
| $\gamma[^\circ]$                       | 120                                                                        | 90                                                                       | 90                                                                       |
| Volume[ $\text{Å}^3$ ]                 | 1133.2(2)                                                                  | 965.99(6)                                                                | 1768.1(3)                                                                |
| $Z$                                    | 3                                                                          | 2                                                                        | 4                                                                        |
| Density [ $\text{Mg}/\text{m}^3$ ]     | 1.781                                                                      | 1.555                                                                    | 1.684                                                                    |
| Abs. coeff. [ $\text{mm}^{-1}$ ]       | 1.661                                                                      | 1.312                                                                    | 1.429                                                                    |
| Abs. correction                        | Semi-empirical from equivalents                                            | Semi-empirical from equivalents                                          | Semi-empirical from equivalents                                          |
| F(000)                                 | 612                                                                        | 462                                                                      | 916                                                                      |
| Reflections collected / unique         | 12466 / 1245                                                               | 9962/2950                                                                | 16186/3553                                                               |
| $R_{int}$                              | 0.0388                                                                     | 0.1134                                                                   | 0.0481                                                                   |
| Data / restraints / parameters         | 1245 / 0 / 114                                                             | 2950 / 79 / 246                                                          | 3553 / 74 / 246                                                          |
| Min. $2\theta/^\circ$                  | 2.968                                                                      | 2.476                                                                    | 2.580                                                                    |
| Max. $2\theta/^\circ$                  | 24.723                                                                     | 27.773                                                                   | 26.351                                                                   |
| Ranges (h, k, l)                       | -10 $\leq$ h $\leq$ 10,<br>10 $\leq$ k $\leq$ 10,<br>20 $\leq$ l $\leq$ 20 | -7 $\leq$ h $\leq$ 8,<br>18 $\leq$ k $\leq$ 19,<br>12 $\leq$ l $\leq$ 10 | -8 $\leq$ h $\leq$ 8,<br>15 $\leq$ k $\leq$ 15,<br>25 $\leq$ l $\leq$ 25 |
| Complete to $2\theta$ (%)              | 96.8 %                                                                     | 94.1 %                                                                   |                                                                          |
| Refinement method                      | Full-matrix least-squares on $F^2$                                         | Full-matrix least-squares on $F^2$                                       | Full-matrix least-squares on $F^2$                                       |
| Goof ( $F^2$ )                         | 1.044                                                                      | 1.039                                                                    | 1.067                                                                    |
| Final $R$ indices [ $I > 2\sigma(I)$ ] | $R_1 = 0.0203$ ,<br>$wR_2 = 0.0456$                                        | $R_1 = 0.0694$ ,<br>$wR_2 = 0.1779$                                      | $R_1 = 0.0734$ ,<br>$wR_2 = 0.1871$                                      |
| $R$ indices (all data)                 | $R_1 = 0.0224$ ,<br>$wR_2 = 0.0464$                                        | $R_1 = 0.0741$ ,<br>$wR_2 = 0.1836$                                      | $R_1 = 0.0816$ ,<br>$wR_2 = 0.1990$                                      |
| CCDC No.                               | 2362016                                                                    | 1879870                                                                  | 2285154                                                                  |

<sup>a</sup> $R_1 = \Sigma(|F_o| - |F_c|)/\Sigma|F_o|$ ; <sup>b</sup> $wR_2 = [\Sigma w(|F_o|^2 - |F_c|^2)^2 / (\Sigma w|F_o|^2)]^{1/2}$ .

**Table S3.** Coordinate file of the DFT optimized structure of metal oxo intermediate generated in the catalytic cycle of complex **3**.

|    |             |             |             |
|----|-------------|-------------|-------------|
| Cu | 0.00000000  | 0.00000000  | 0.00000000  |
| O  | 0.00000000  | 0.00000000  | 2.96235735  |
| O  | 3.21606334  | 0.00000000  | 0.38361866  |
| N  | -0.26574464 | 1.87922005  | 0.51420063  |
| N  | 2.21883428  | 0.80231757  | 0.50907660  |
| N  | 0.23639586  | -1.88227775 | -0.43622703 |
| N  | 0.11036840  | -0.79903117 | 1.94668960  |

|   |             |             |             |
|---|-------------|-------------|-------------|
| C | 0.79236959  | 2.64029939  | 0.94792341  |
| C | 0.29697846  | -2.10743195 | 1.95989454  |
| C | 0.57547952  | -4.10717791 | 0.41917519  |
| H | 0.68680257  | -4.78169979 | 1.26037412  |
| C | 2.13781391  | 2.02769150  | 0.96981726  |
| C | 0.42327925  | -2.88599010 | 3.24445724  |
| H | 0.31516576  | -2.22787665 | 4.10931968  |
| H | -0.34877311 | -3.66334493 | 3.30457170  |
| C | 3.36303439  | 2.73726694  | 1.52265752  |
| H | 3.35967466  | 3.78127629  | 1.18814813  |
| H | 4.25557173  | 2.27019929  | 1.09113076  |
| C | 0.57662820  | 3.97794547  | 1.33398230  |
| H | 1.40425676  | 4.58512918  | 1.67941339  |
| C | 0.63102185  | -4.59264270 | -0.90143555 |
| H | 0.78654817  | -5.65169625 | -1.08375616 |
| C | 0.48542303  | -3.70154819 | -1.97972378 |
| H | 0.52410543  | -4.04476325 | -3.00731916 |
| C | -0.71472186 | 4.52586543  | 1.25750756  |
| H | -0.88616226 | 5.55655177  | 1.55285223  |
| C | -1.51010825 | 2.40948554  | 0.41406592  |
| H | -2.28662825 | 1.76257720  | 0.02172239  |
| C | 0.28849443  | -2.33690937 | -1.70966136 |
| H | 0.17511658  | -1.59509692 | -2.49446485 |
| C | -1.77665255 | 3.73498931  | 0.78483258  |
| H | -2.78370833 | 4.12703668  | 0.69870739  |
| C | 0.37477742  | -2.73312072 | 0.63196318  |
| O | -0.49756968 | 0.42983089  | -1.76458796 |
| H | 1.40268218  | -3.37757811 | 3.30447453  |
| C | 3.44141493  | 2.67183949  | 3.07170313  |
| H | 2.56986485  | 3.13724129  | 3.54666581  |
| H | 3.50405894  | 1.63438431  | 3.41893616  |
| H | 4.33807080  | 3.19855740  | 3.41688328  |

**Table S4.**Coordinate file of the DFT optimized structure of metal peroxo intermediate generated in the catalytic cycle of complex **1**.

|    |                 |                 |                 |
|----|-----------------|-----------------|-----------------|
| Cu | -2.117518000000 | 0.679377000000  | -0.202544000000 |
| O  | -3.886997000000 | 2.594638000000  | 1.124845000000  |
| O  | -1.561360000000 | -0.002936000000 | 3.039598000000  |
| N  | -1.281959000000 | 2.494233000000  | -0.219672000000 |
| N  | -1.396378000000 | 0.877261000000  | 1.945522000000  |
| N  | -3.323739000000 | -0.748527000000 | -0.793969000000 |
| N  | -3.880669000000 | 1.481207000000  | 0.484332000000  |
| C  | -0.878699000000 | 2.987406000000  | 0.990447000000  |

|    |                 |                 |                 |
|----|-----------------|-----------------|-----------------|
| C  | -4.917659000000 | 0.698139000000  | 0.230990000000  |
| C  | -5.630510000000 | -1.457729000000 | -0.877503000000 |
| H  | -6.671777000000 | -1.279742000000 | -0.630161000000 |
| C  | -0.992792000000 | 2.093481000000  | 2.155043000000  |
| C  | -0.383436000000 | 4.296225000000  | 1.110491000000  |
| H  | -0.070813000000 | 4.674062000000  | 2.079110000000  |
| C  | -5.240466000000 | -2.600413000000 | -1.596481000000 |
| H  | -5.985836000000 | -3.324219000000 | -1.912065000000 |
| C  | -3.880669000000 | -2.795637000000 | -1.913596000000 |
| H  | -3.554260000000 | -3.659975000000 | -2.480860000000 |
| C  | -0.314774000000 | 5.108351000000  | -0.037179000000 |
| H  | 0.044286000000  | 6.130322000000  | 0.036653000000  |
| C  | -1.202598000000 | 3.261655000000  | -1.329906000000 |
| H  | -1.538075000000 | 2.821087000000  | -2.262833000000 |
| C  | -2.942156000000 | -1.840924000000 | -1.492160000000 |
| H  | -1.882572000000 | -1.919679000000 | -1.715159000000 |
| C  | -0.725428000000 | 4.584259000000  | -1.276117000000 |
| H  | -0.700816000000 | 5.184231000000  | -2.179416000000 |
| C  | -4.646360000000 | -0.529722000000 | -0.486579000000 |
| O  | -0.644429000000 | -0.252096000000 | -1.094461000000 |
| H  | -5.911440000000 | 0.992931000000  | 0.554543000000  |
| H  | -0.746163000000 | 2.490776000000  | 3.141495000000  |
| H  | -1.535662000000 | 0.485276000000  | 3.904438000000  |
| O  | 0.644429000000  | 0.252096000000  | -1.094461000000 |
| Cu | 2.117518000000  | -0.679377000000 | -0.202544000000 |
| N  | 1.396378000000  | -0.877261000000 | 1.945522000000  |
| N  | 3.323739000000  | 0.748527000000  | -0.793969000000 |
| N  | 3.880669000000  | -1.481207000000 | 0.484332000000  |
| N  | 1.281959000000  | -2.494233000000 | -0.219672000000 |
| O  | 1.561360000000  | 0.002936000000  | 3.039598000000  |
| C  | 0.992792000000  | -2.093481000000 | 2.155043000000  |
| C  | 2.942156000000  | 1.840924000000  | -1.492160000000 |
| C  | 4.646360000000  | 0.529722000000  | -0.486579000000 |
| O  | 3.886997000000  | -2.594638000000 | 1.124845000000  |
| C  | 4.917659000000  | -0.698139000000 | 0.230990000000  |
| C  | 0.878699000000  | -2.987406000000 | 0.990447000000  |
| C  | 1.202598000000  | -3.261655000000 | -1.329906000000 |
| H  | 1.535662000000  | -0.485276000000 | 3.904438000000  |
| H  | 0.746163000000  | -2.490776000000 | 3.141495000000  |
| C  | 3.880669000000  | 2.795637000000  | -1.913596000000 |
| H  | 1.882572000000  | 1.919679000000  | -1.715159000000 |
| C  | 5.630510000000  | 1.457729000000  | -0.877503000000 |
| H  | 5.911440000000  | -0.992931000000 | 0.554543000000  |
| C  | 0.383436000000  | -4.296225000000 | 1.110491000000  |
| H  | 1.538075000000  | -2.821087000000 | -2.262833000000 |
| C  | 0.725428000000  | -4.584259000000 | -1.276117000000 |
| C  | 5.240466000000  | 2.600413000000  | -1.596481000000 |
| H  | 3.554260000000  | 3.659975000000  | -2.480860000000 |
| H  | 6.671777000000  | 1.279742000000  | -0.630161000000 |
| H  | 0.070813000000  | -4.674062000000 | 2.079110000000  |

|   |                 |                 |                 |
|---|-----------------|-----------------|-----------------|
| C | 0.314774000000  | -5.108351000000 | -0.037179000000 |
| H | 0.700816000000  | -5.184231000000 | -2.179416000000 |
| H | 5.985836000000  | 3.324219000000  | -1.912065000000 |
| H | -0.044286000000 | -6.130322000000 | 0.036653000000  |

**Table S5.**Coordinate file of the DFT optimized structure of metal peroxo intermediate generated in the catalytic cycle of complex **2**.

|    |                 |                 |                 |
|----|-----------------|-----------------|-----------------|
| Cu | -0.117553000000 | 0.351219000000  | 0.466715000000  |
| O  | -0.958335000000 | 3.006129000000  | -0.729926000000 |
| H  | -0.098516000000 | 3.162452000000  | -0.174617000000 |
| O  | 1.134320000000  | 2.811529000000  | 0.737486000000  |
| N  | 1.337394000000  | -0.861270000000 | -0.719522000000 |
| N  | 1.402094000000  | 1.543872000000  | 0.431598000000  |
| N  | -1.795240000000 | -0.680802000000 | 0.414613000000  |
| N  | -1.313246000000 | 1.693122000000  | -0.468351000000 |
| C  | 2.569243000000  | -0.293471000000 | -0.527223000000 |
| C  | -2.514901000000 | 1.284839000000  | -0.791201000000 |
| C  | -4.010605000000 | -0.767278000000 | -0.522139000000 |
| H  | -4.802013000000 | -0.307961000000 | -1.103706000000 |
| C  | 2.561270000000  | 1.082151000000  | 0.005685000000  |
| C  | -3.538113000000 | 2.130593000000  | -1.493316000000 |
| H  | -3.140051000000 | 3.127539000000  | -1.686491000000 |
| H  | -3.822957000000 | 1.675614000000  | -2.451141000000 |
| C  | 3.789391000000  | 1.955044000000  | 0.016458000000  |
| H  | 3.534034000000  | 2.964920000000  | 0.342716000000  |
| H  | 4.236078000000  | 2.006705000000  | -0.983915000000 |
| H  | 4.545523000000  | 1.547528000000  | 0.700801000000  |
| C  | 3.752894000000  | -0.973208000000 | -0.870260000000 |
| H  | 4.720547000000  | -0.511617000000 | -0.708902000000 |
| C  | -4.188148000000 | -2.042329000000 | 0.053000000000  |
| H  | -5.122875000000 | -2.576147000000 | -0.089819000000 |
| C  | -3.156388000000 | -2.611532000000 | 0.819874000000  |
| H  | -3.270570000000 | -3.582085000000 | 1.289736000000  |
| C  | 3.660372000000  | -2.265284000000 | -1.417688000000 |
| H  | 4.560049000000  | -2.809991000000 | -1.687676000000 |
| C  | 1.252909000000  | -2.103642000000 | -1.240388000000 |
| H  | 0.255977000000  | -2.512759000000 | -1.373630000000 |
| C  | -1.955696000000 | -1.894288000000 | 0.979758000000  |
| H  | -1.120109000000 | -2.259084000000 | 1.570611000000  |
| C  | 2.392688000000  | -2.843069000000 | -1.609045000000 |
| H  | 2.283076000000  | -3.835425000000 | -2.033151000000 |
| C  | -2.796335000000 | -0.093461000000 | -0.320407000000 |
| O  | 0.394333000000  | -0.584130000000 | 2.099831000000  |
| O  | 1.787599000000  | -0.698235000000 | 2.449153000000  |
| H  | 1.905416000000  | -0.038795000000 | 3.180322000000  |
| H  | -4.446426000000 | 2.226589000000  | -0.885256000000 |



**Table S6.**Coordinate file of the DFT optimized structure of metal peroxo intermediate generated in the catalytic cycle of complex **3**.

|    |                 |                 |                 |
|----|-----------------|-----------------|-----------------|
| Cu | -0.034465000000 | -0.229676000000 | 0.487498000000  |
| O  | 1.220912000000  | -2.742310000000 | -0.642057000000 |
| H  | 0.381284000000  | -3.018377000000 | -0.100395000000 |
| O  | -0.902060000000 | -2.850122000000 | 0.782418000000  |
| N  | -1.643847000000 | 0.728342000000  | -0.738881000000 |
| N  | -1.354196000000 | -1.640942000000 | 0.454147000000  |
| N  | 1.465963000000  | 1.046052000000  | 0.430450000000  |
| N  | 1.358280000000  | -1.382635000000 | -0.411808000000 |
| C  | -2.776468000000 | -0.017991000000 | -0.547619000000 |
| C  | 2.484559000000  | -0.801493000000 | -0.745280000000 |
| C  | 3.646906000000  | 1.462857000000  | -0.495318000000 |
| H  | 4.505083000000  | 1.127141000000  | -1.065992000000 |
| C  | -2.564790000000 | -1.367801000000 | 0.009198000000  |
| C  | 3.631970000000  | -1.521202000000 | -1.406223000000 |
| H  | 3.228051000000  | -2.339907000000 | -2.008912000000 |
| H  | 4.154458000000  | -0.835610000000 | -2.083821000000 |
| C  | -3.645517000000 | -2.417672000000 | 0.022585000000  |
| H  | -3.242626000000 | -3.371848000000 | 0.367109000000  |
| H  | -4.067742000000 | -2.551201000000 | -0.980818000000 |
| H  | -4.462692000000 | -2.120655000000 | 0.693524000000  |
| C  | -4.046189000000 | 0.466758000000  | -0.913318000000 |
| H  | -4.933669000000 | -0.134852000000 | -0.752333000000 |
| C  | 3.620715000000  | 2.756674000000  | 0.064404000000  |
| H  | 4.463056000000  | 3.426460000000  | -0.080245000000 |
| C  | 2.507837000000  | 3.169408000000  | 0.817527000000  |
| H  | 2.466691000000  | 4.151791000000  | 1.274689000000  |
| C  | -4.146077000000 | 1.748620000000  | -1.482916000000 |
| H  | -5.115299000000 | 2.144689000000  | -1.770617000000 |
| C  | -1.744431000000 | 1.960249000000  | -1.281212000000 |
| H  | -0.820244000000 | 2.514819000000  | -1.412878000000 |
| C  | 1.431787000000  | 2.276602000000  | 0.979840000000  |
| H  | 0.544828000000  | 2.514679000000  | 1.560461000000  |
| C  | -2.979497000000 | 2.510439000000  | -1.673272000000 |
| H  | -3.018006000000 | 3.500803000000  | -2.114145000000 |
| C  | 2.550467000000  | 0.610284000000  | -0.293270000000 |
| O  | -0.709220000000 | 0.648700000000  | 2.090750000000  |
| O  | -2.108878000000 | 0.552099000000  | 2.421654000000  |
| H  | -2.133794000000 | -0.105310000000 | 3.163553000000  |
| C  | 4.630721000000  | -2.102467000000 | -0.363488000000 |
| H  | 5.444879000000  | -2.615527000000 | -0.886242000000 |
| H  | 5.070682000000  | -1.318314000000 | 0.264506000000  |
| H  | 4.133175000000  | -2.830430000000 | 0.285828000000  |

**Table S7.** TON calculated for complexes **1**, **2** and **3** for chemically driven water oxidation catalytic activity using Cerium ammonium nitrate (CAN) as the primary chemical oxidant

| <b>Complex</b> | <b>TON (s<sup>-1</sup>)</b> |
|----------------|-----------------------------|
| 1              | 0.011                       |
| 2              | 0.017                       |
| 3              | 0.019                       |
